# Supplementary material for: C–H addition reactivity of 2-phenylpyridine and 2,2′-bipyridine with pentaphenylborole
Source: Royal Society of Chemistry journal article supplement (doi:10.1039/c7dt02321a), 2017-01-01
Supplement: c7dt02321a1.pdf [file c7dt02321a1.pdf]

## Supporting Information for:

# C-H Addition Reactivity of 2-Phenylpyridine and 2,2'- Bipyridine with Pentaphenylborole

*Venkata A. K. Adiraju and Caleb D. Martin\**

Baylor University, Department of Chemistry and Biochemistry, One Bear Place #97348,  
Waco, TX 76798

E-mail: [caleb\\_d\\_martin@baylor.edu](mailto:caleb_d_martin@baylor.edu)

## Table of Contents

|                                                                                      |     |
|--------------------------------------------------------------------------------------|-----|
| Multinuclear NMR spectra for <b>1</b> .....                                          | S3  |
| FT-IR spectrum of <b>1</b> .....                                                     | S8  |
| Stacked plot of <sup>1</sup> H NMR spectrum of <b>2</b> at 25 °C and -80 °C.....     | S9  |
| Multinuclear NMR spectra for <b>2</b> .....                                          | S10 |
| FT-IR spectrum of <b>2</b> .....                                                     | S17 |
| Stacked plot of <sup>1</sup> H NMR spectrum of <i>syn-3</i> at 25 °C and -70 °C..... | S18 |
| Multinuclear NMR spectra for <i>syn-3</i> .....                                      | S19 |
| FT-IR spectrum of <i>syn-3</i> .....                                                 | S26 |
| Multinuclear NMR spectra for <i>anti-3</i> .....                                     | S27 |
| FT-IR spectrum of <i>anti-3</i> .....                                                | S32 |
| Stacked plot of <sup>1</sup> H NMR spectrum of <i>syn-4</i> at 25 °C and -45 °C..... | S33 |
| Multinuclear NMR spectra for <i>syn-4</i> .....                                      | S34 |
| FT-IR spectrum of <i>syn-4</i> .....                                                 | S39 |
| X-ray crystallographic details.....                                                  | S40 |
| References.....                                                                      | S41 |

Figure S-1:  $^1\text{H}$  NMR spectrum of **1** in  $\text{CDCl}_3$ .

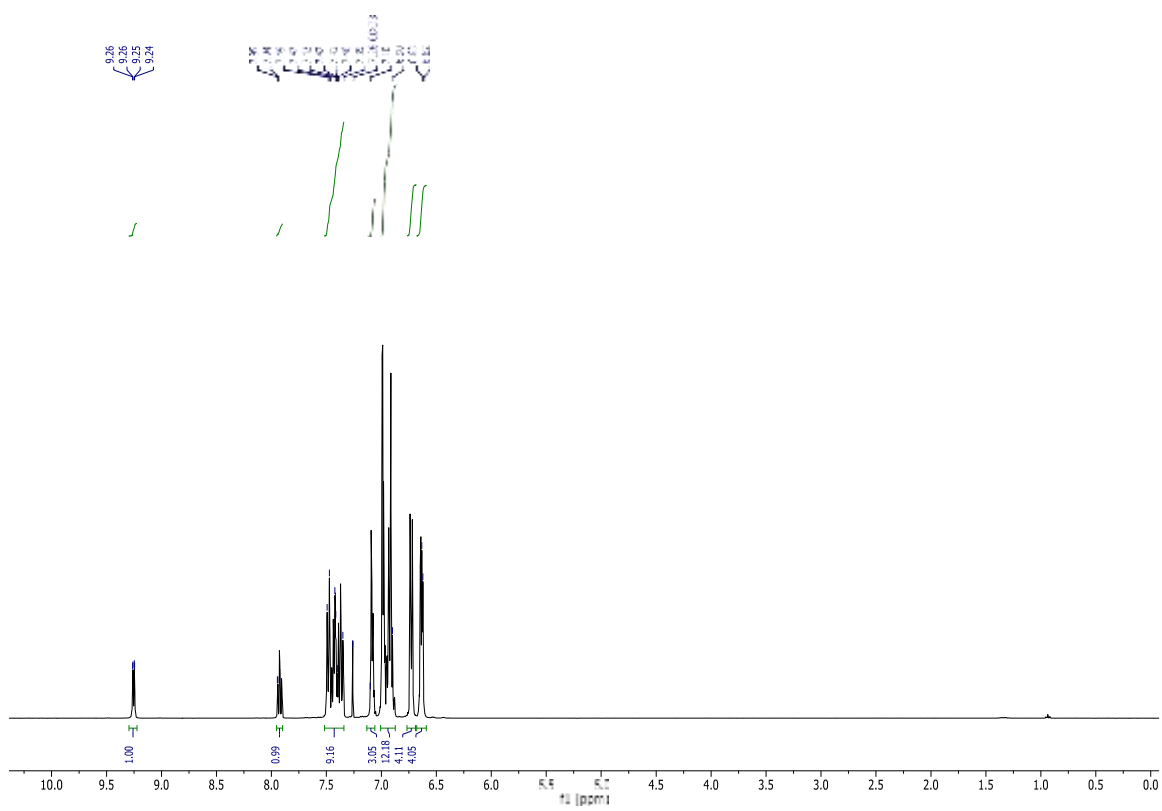

Figure S-2: Expansion of  $^1\text{H}$  NMR spectrum of **1** in  $\text{CDCl}_3$  (aryl region).

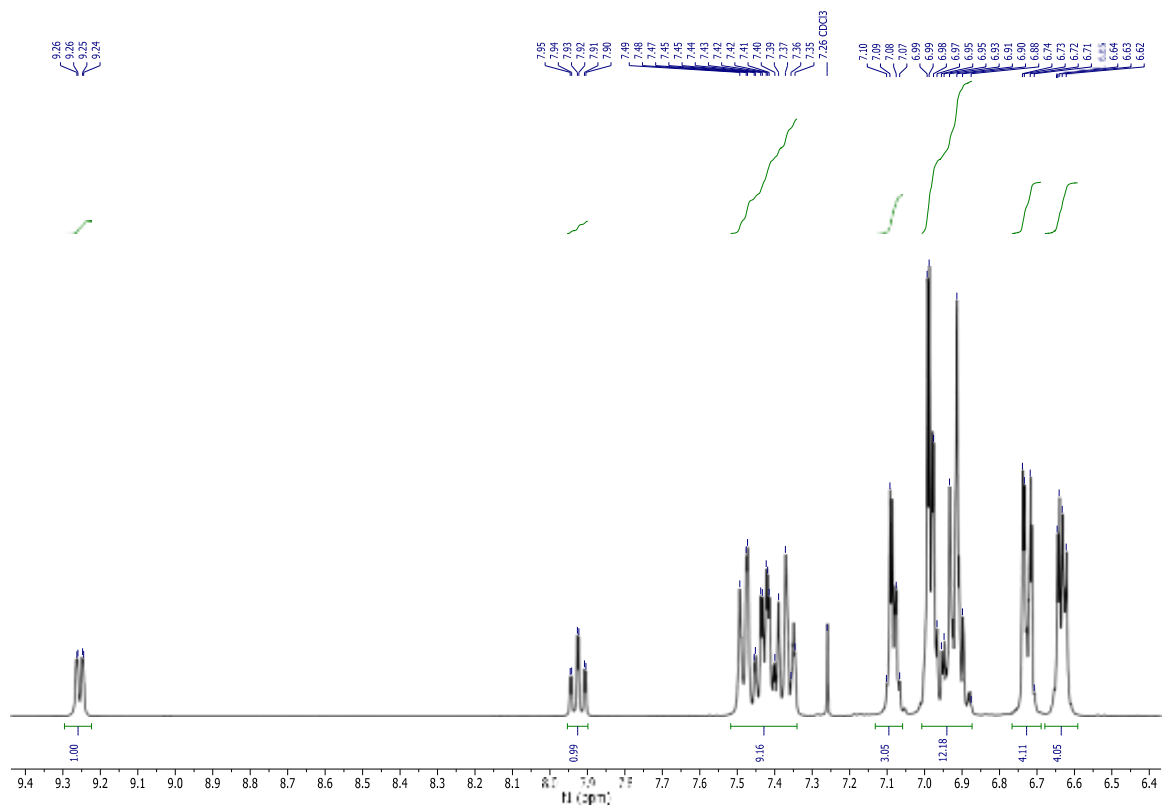

Figure S-3:  $^{13}\text{C}\{^1\text{H}\}$  NMR spectrum of **1** in  $\text{CDCl}_3$ .

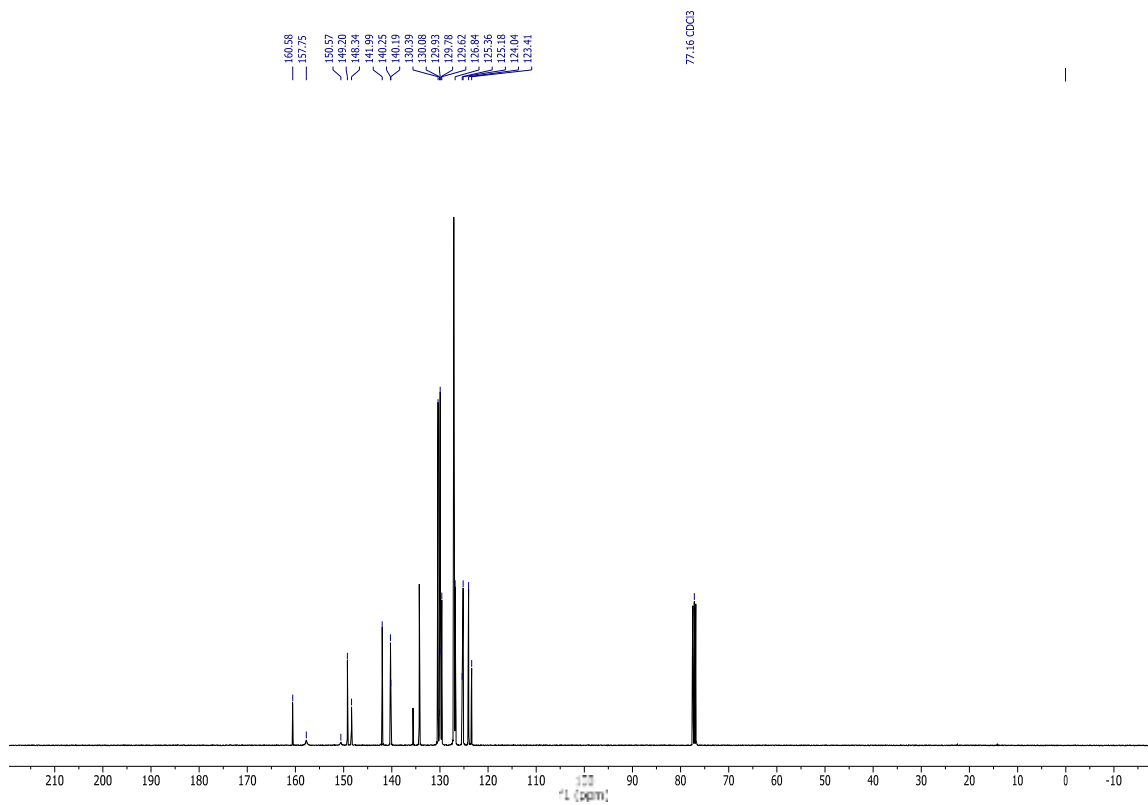

Figure S-4: Expansion of  $^{13}\text{C}\{^1\text{H}\}$  NMR spectrum of **1** in  $\text{CDCl}_3$  (aryl region).

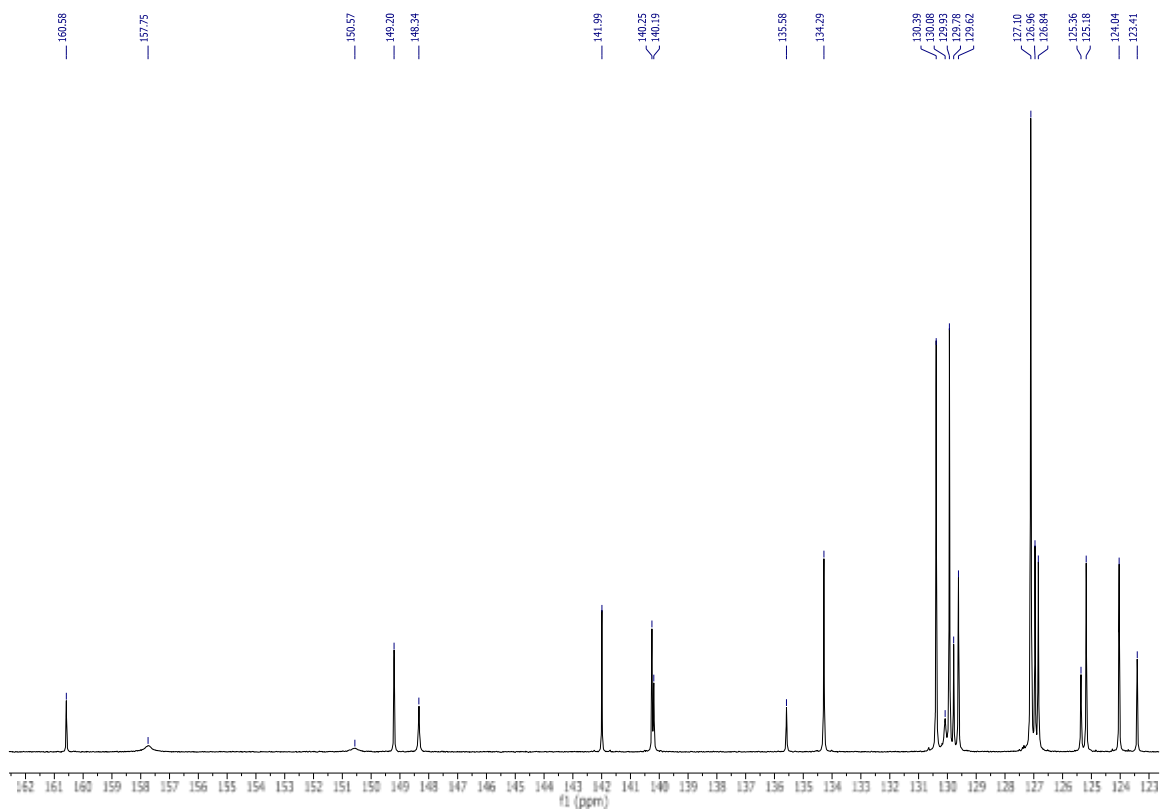

Figure S-5:  $^{11}\text{B}\{^1\text{H}\}$  NMR spectrum of **1** in  $\text{CDCl}_3$ .

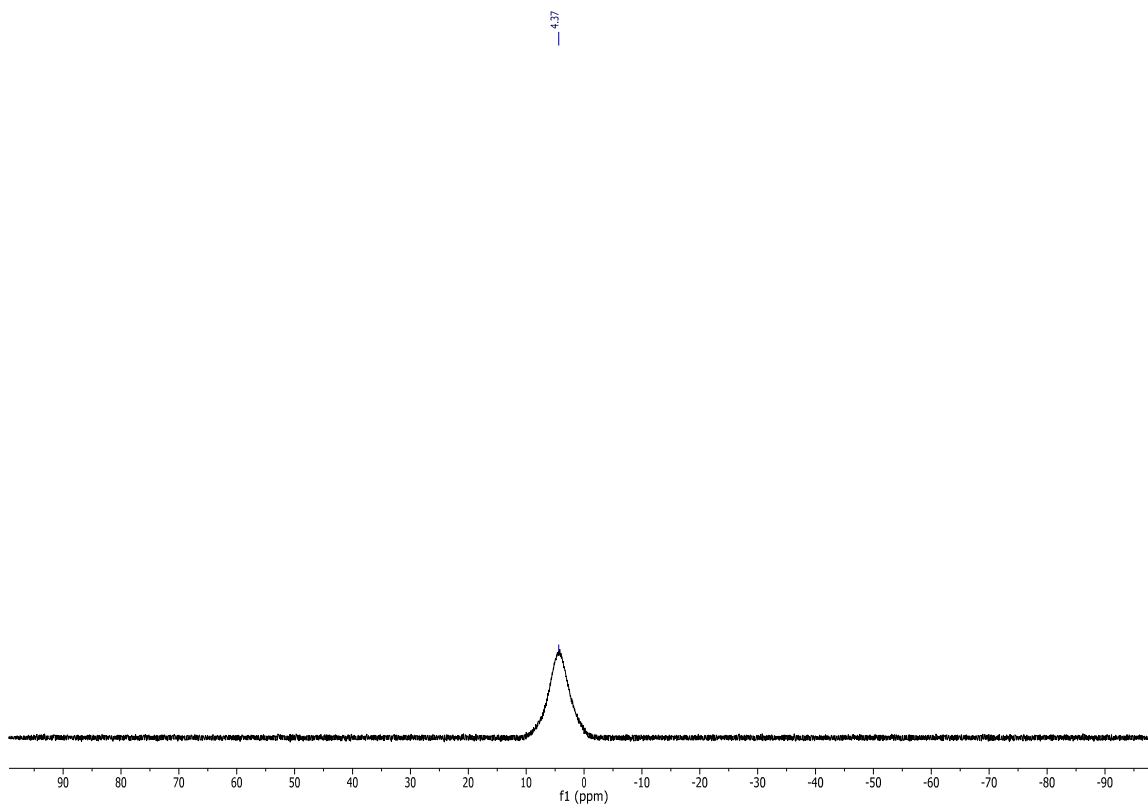

Figure S-6: FT-IR spectrum of **1**.

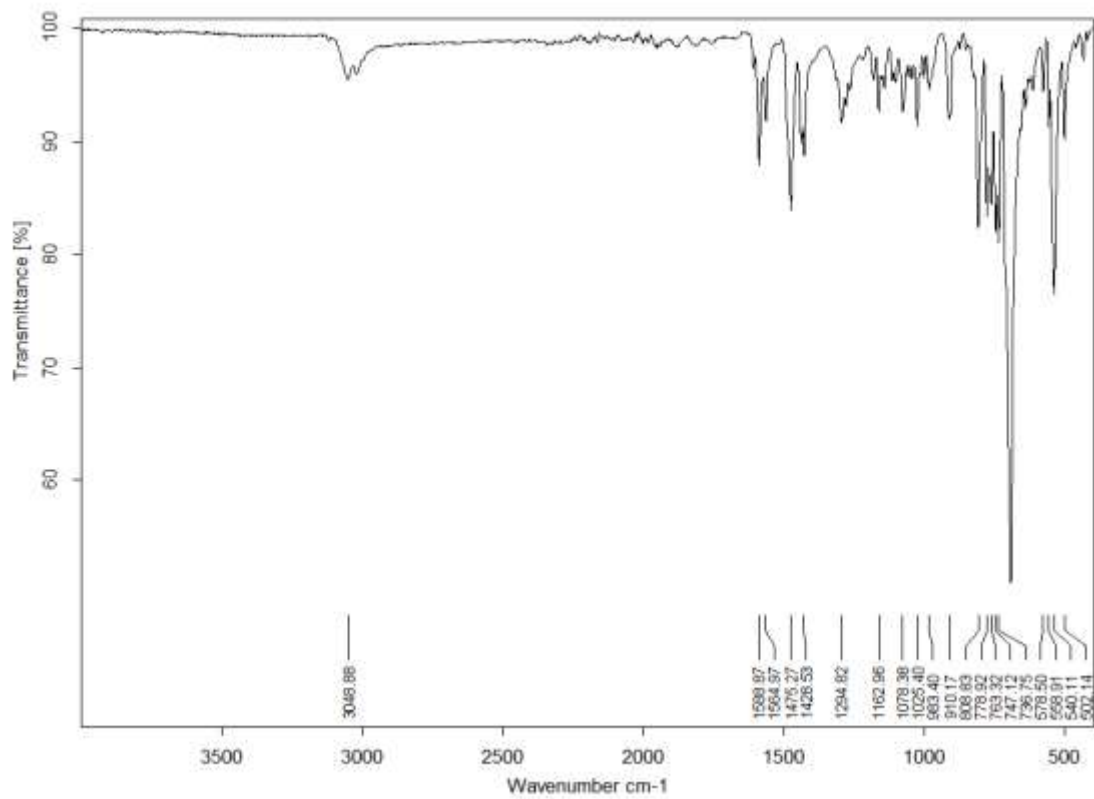



Figure S-7: Stacked plot of  $^1\text{H}$  NMR spectrum of **2** at 25 °C and -80 °C in  $\text{CD}_2\text{Cl}_2$  ( $\bullet$   $\text{CD}_2\text{Cl}_2$ ).

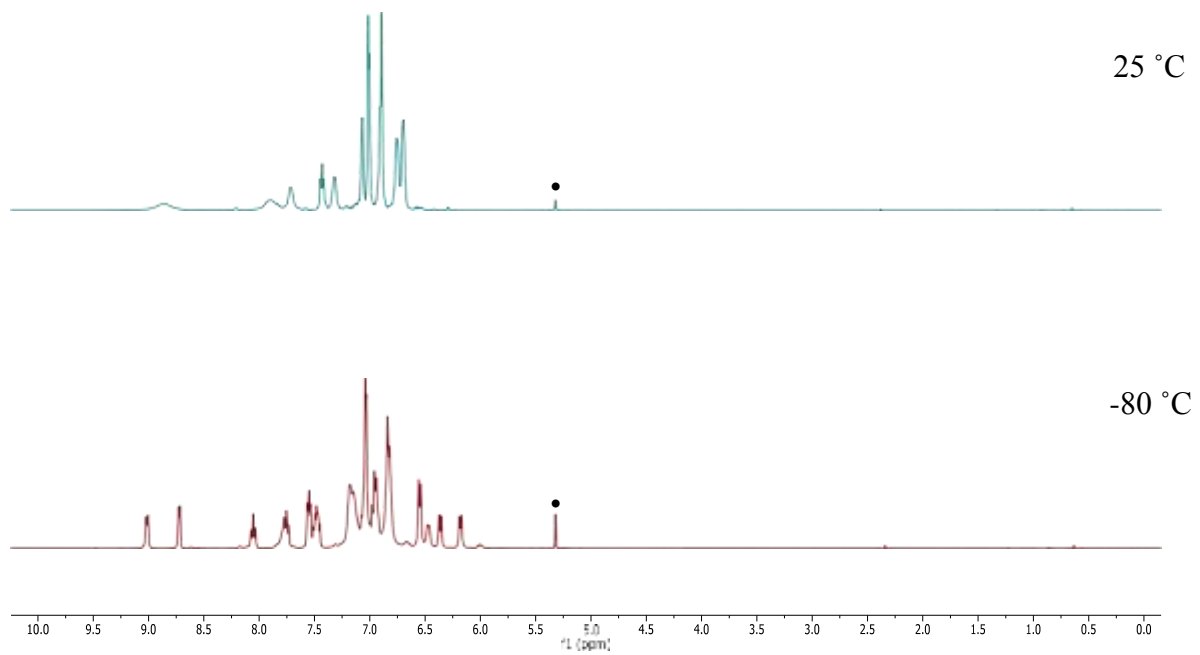

Figure S-8:  $^1\text{H}$  NMR spectrum of **2** in  $\text{CD}_2\text{Cl}_2$  at  $-80^\circ\text{C}$ .

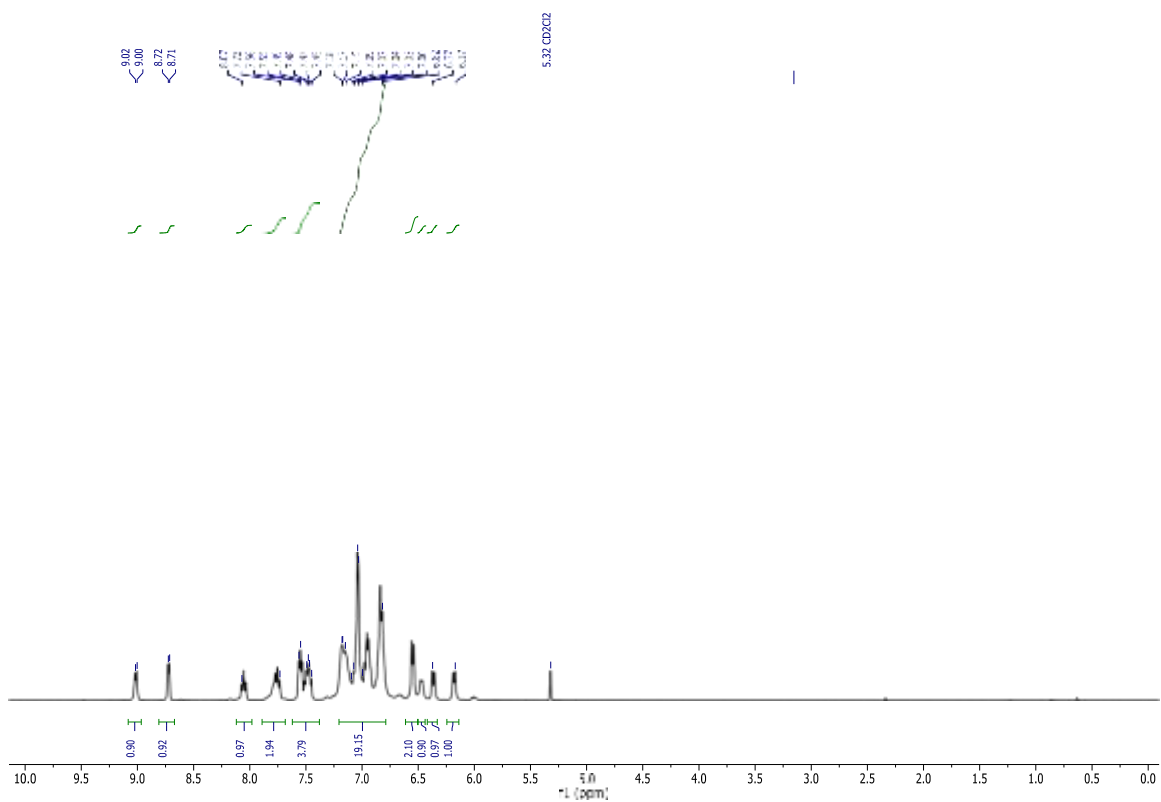

Figure S-9: Expansion of  $^1\text{H}$  NMR spectrum of **2** in  $\text{CD}_2\text{Cl}_2$  at  $-80\text{ }^\circ\text{C}$  (aryl region).

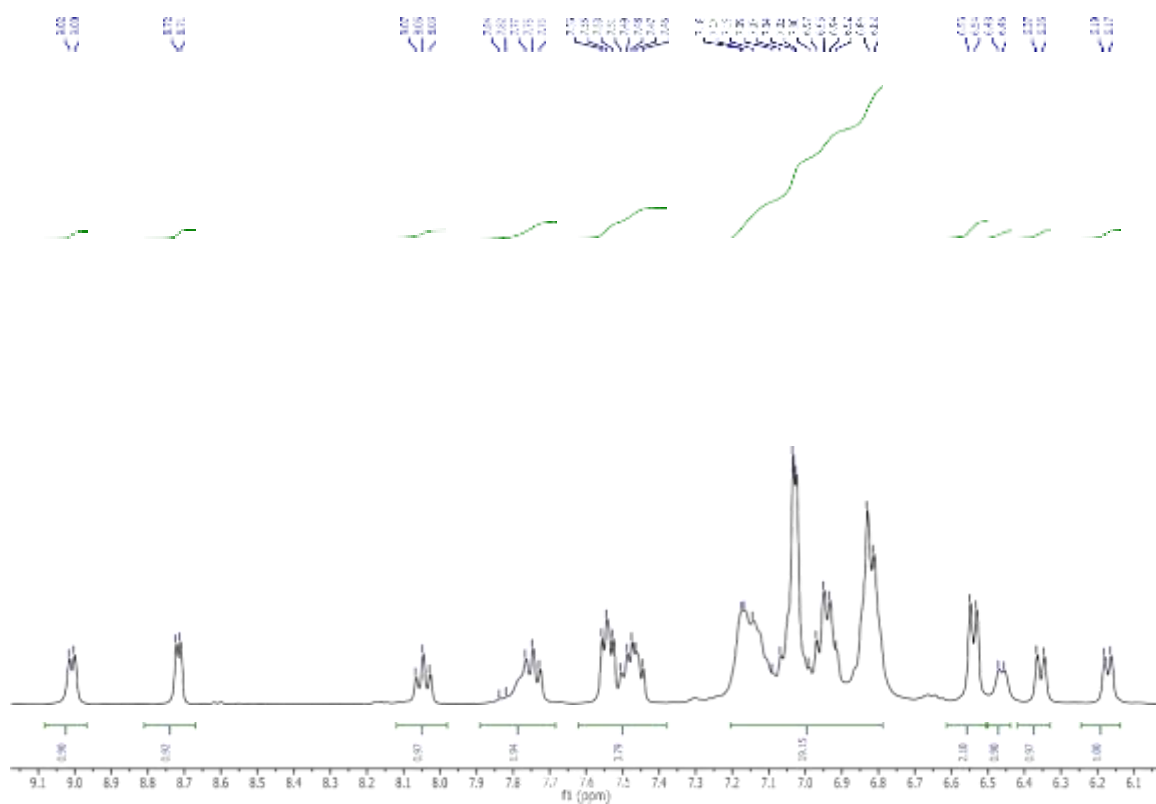

Figure S-10:  $^1\text{H}$  NMR spectrum of **2** in  $\text{CDCl}_3$ .

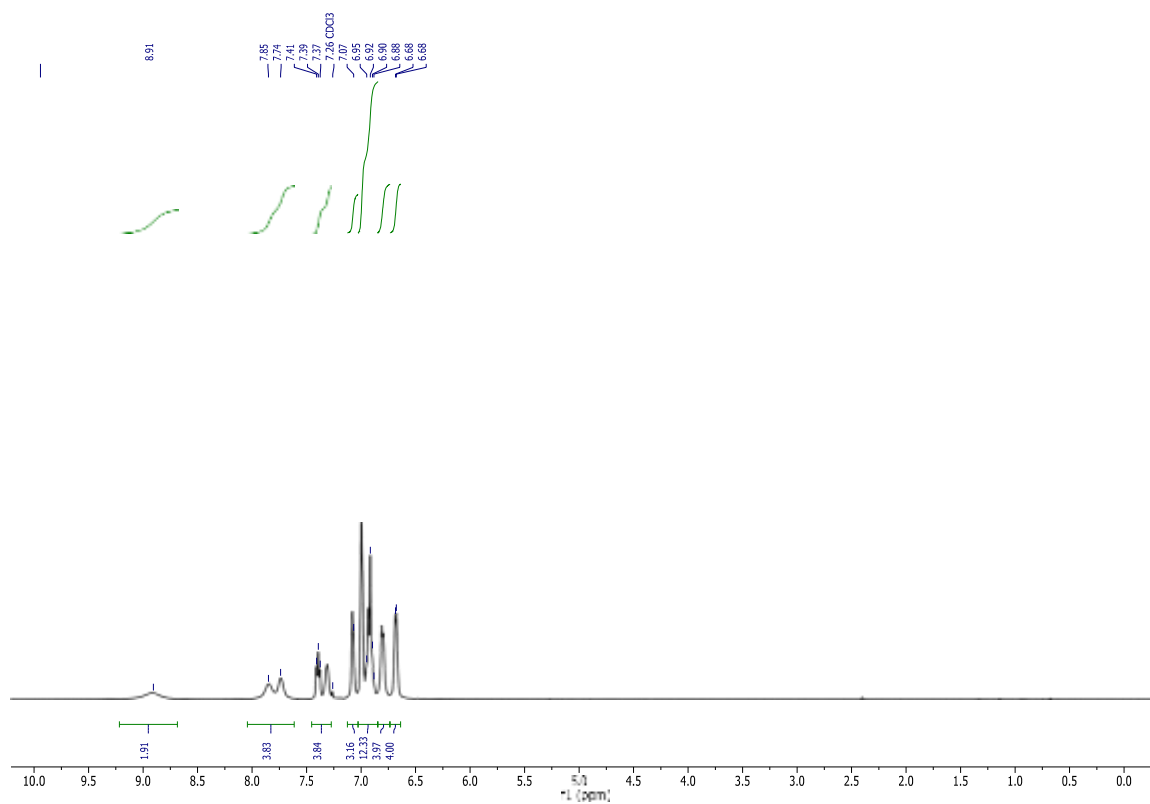

Figure S-11: Expansion of  $^1\text{H}$  NMR spectrum of **2** in  $\text{CDCl}_3$  (aryl region).

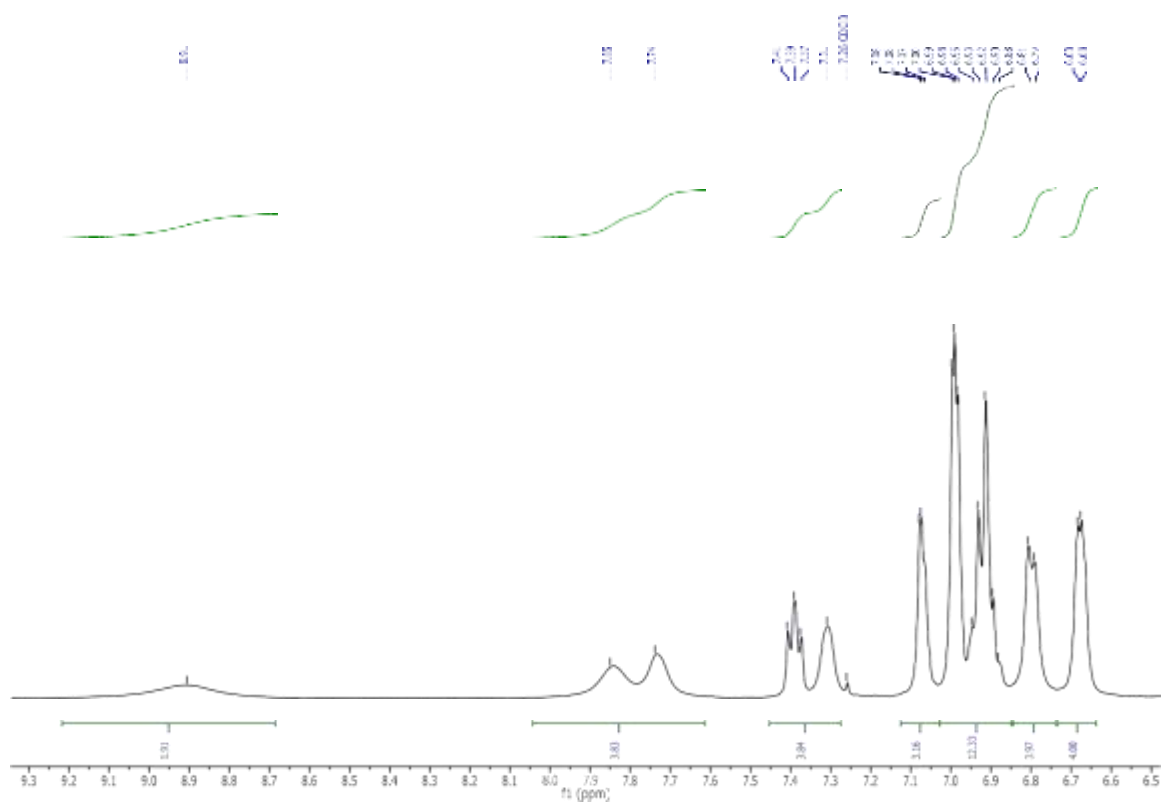

Figure S-12:  $^{13}\text{C}\{^1\text{H}\}$  NMR spectrum of **2** in  $\text{CDCl}_3$ .

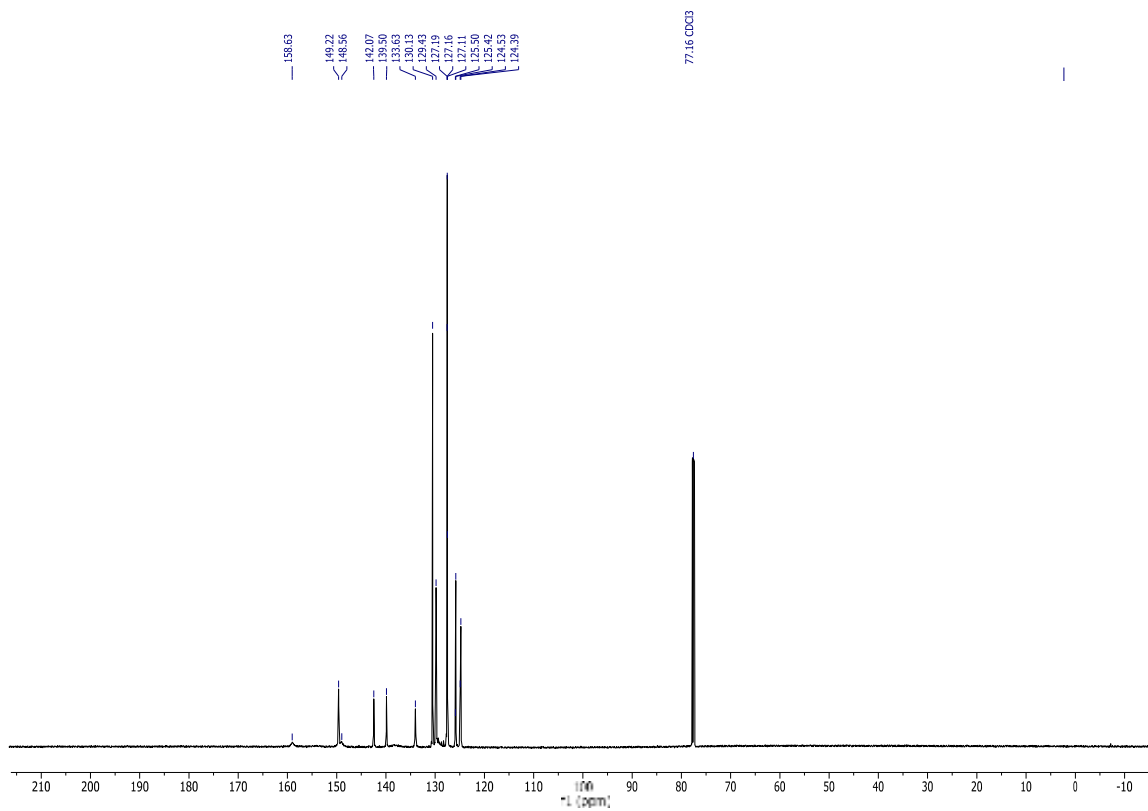

Figure S-13: Expansion of  $^{13}\text{C}\{^1\text{H}\}$  NMR spectrum of **2** in  $\text{CDCl}_3$  (aryl region).

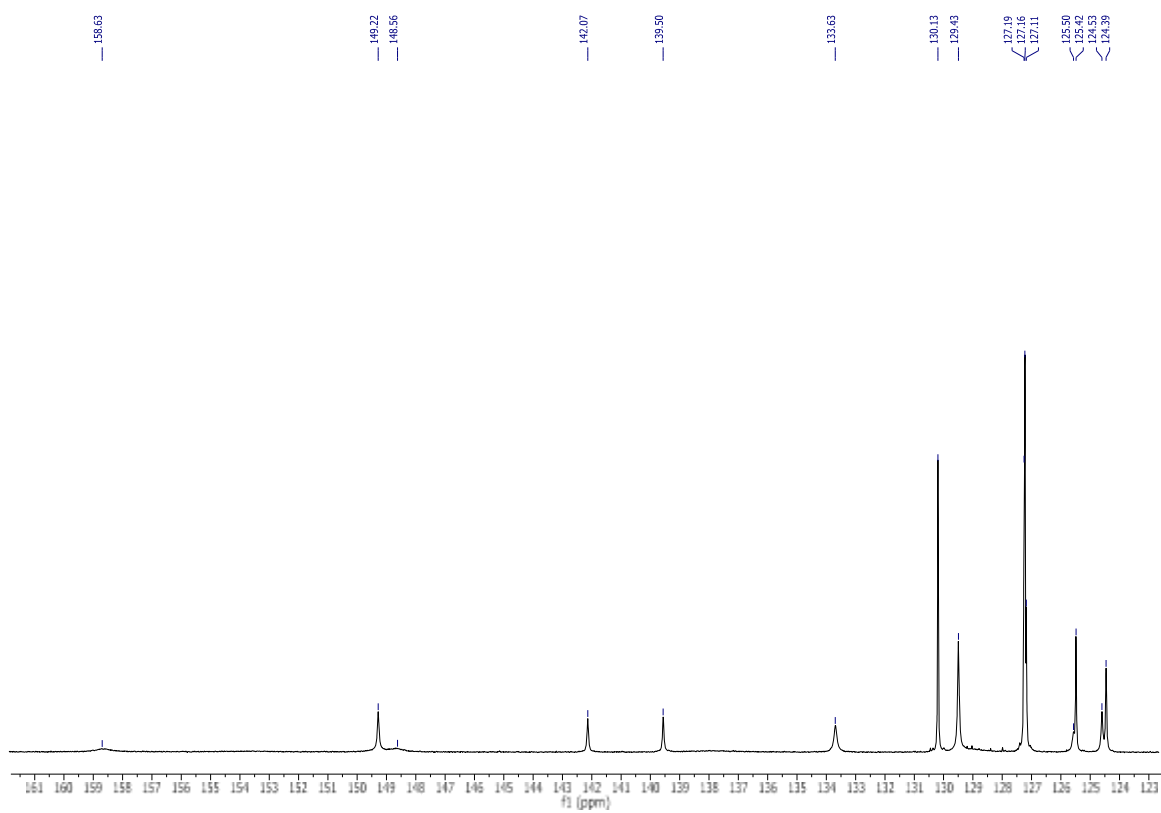

Figure S-14:  $^{11}\text{B}\{^1\text{H}\}$  NMR spectrum of **2** in  $\text{CDCl}_3$ .

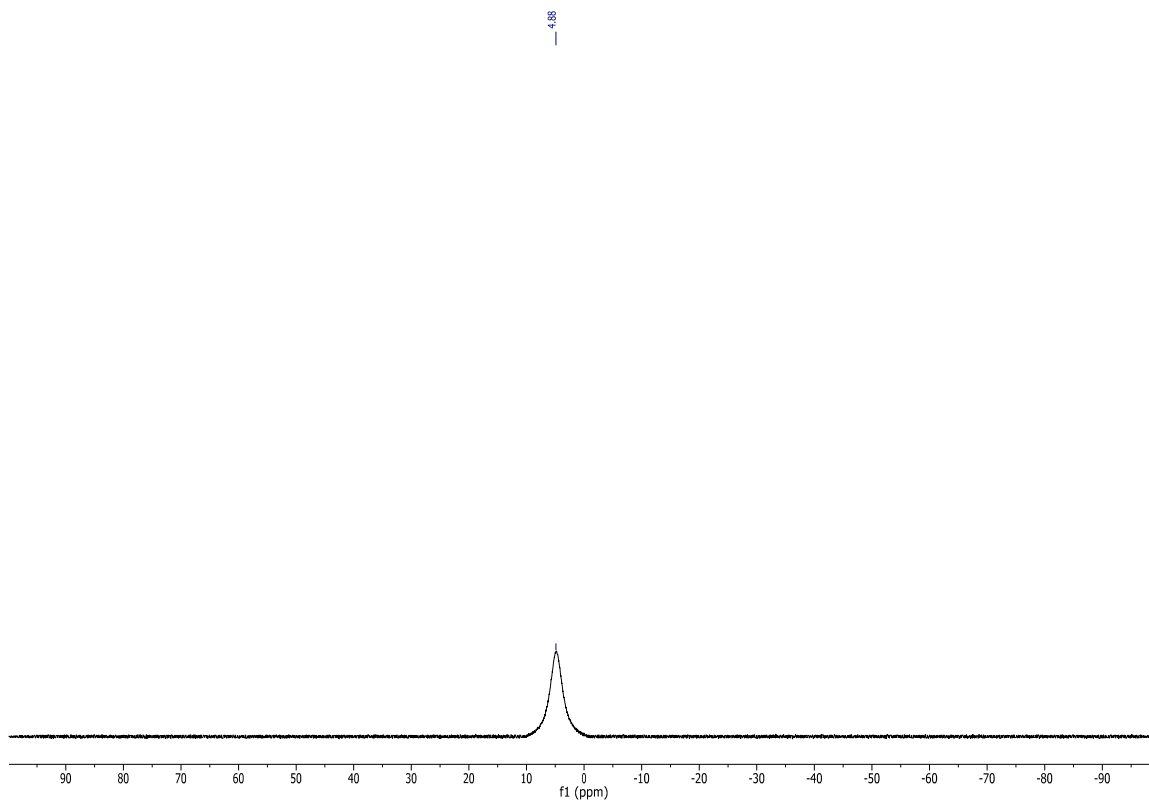



Figure S-15: FT-IR spectrum of **2**.

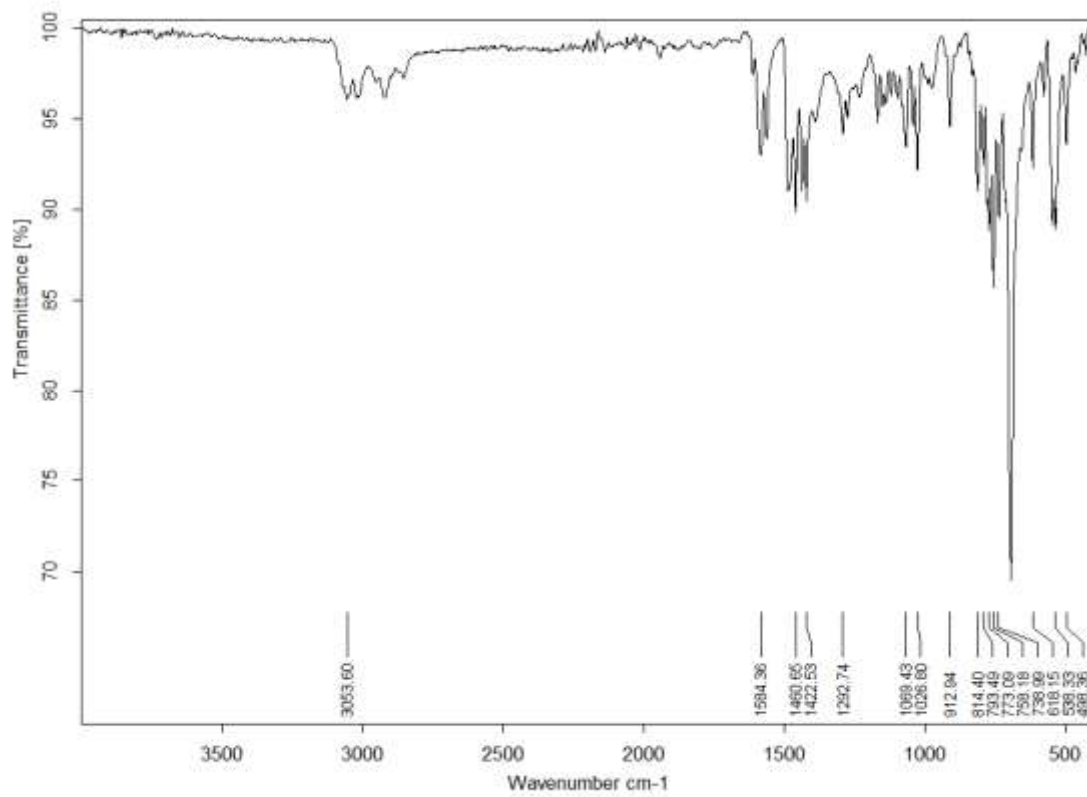

Figure S-16: Stacked plot of  $^1\text{H}$  NMR spectrum of *syn-3* at 25 °C and -70 °C in toluene- $d_8$  (• toluene- $d_8$ ).

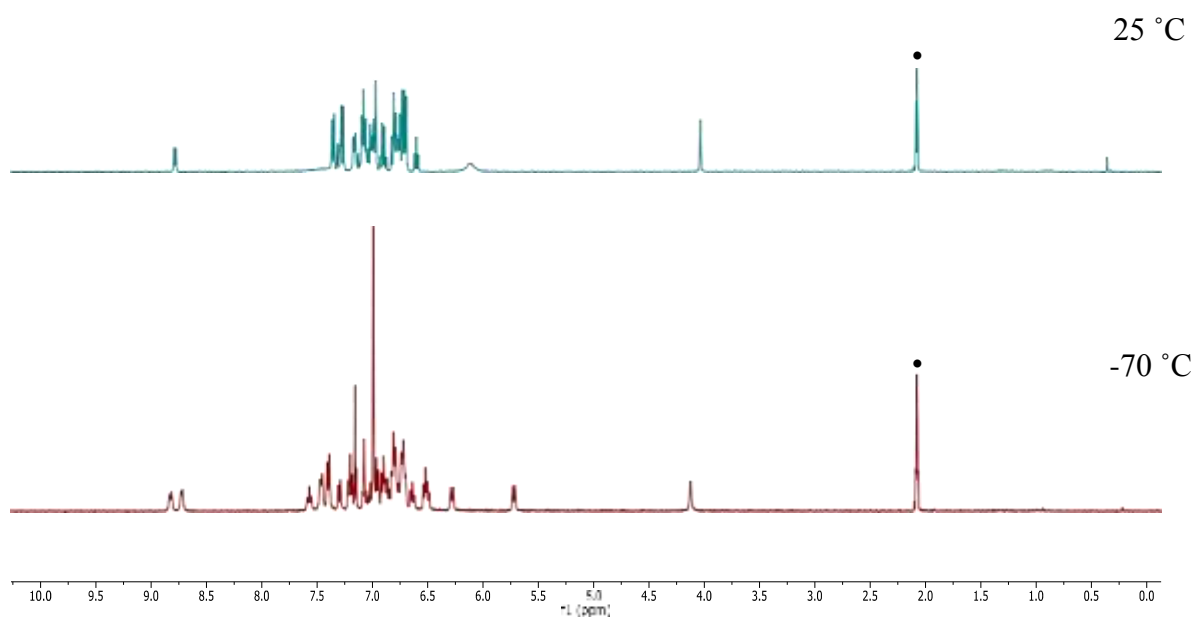

Figure S-17:  $^1\text{H}$  NMR spectrum of *syn-3* in toluene- $d_8$  at  $-70\text{ }^\circ\text{C}$ .

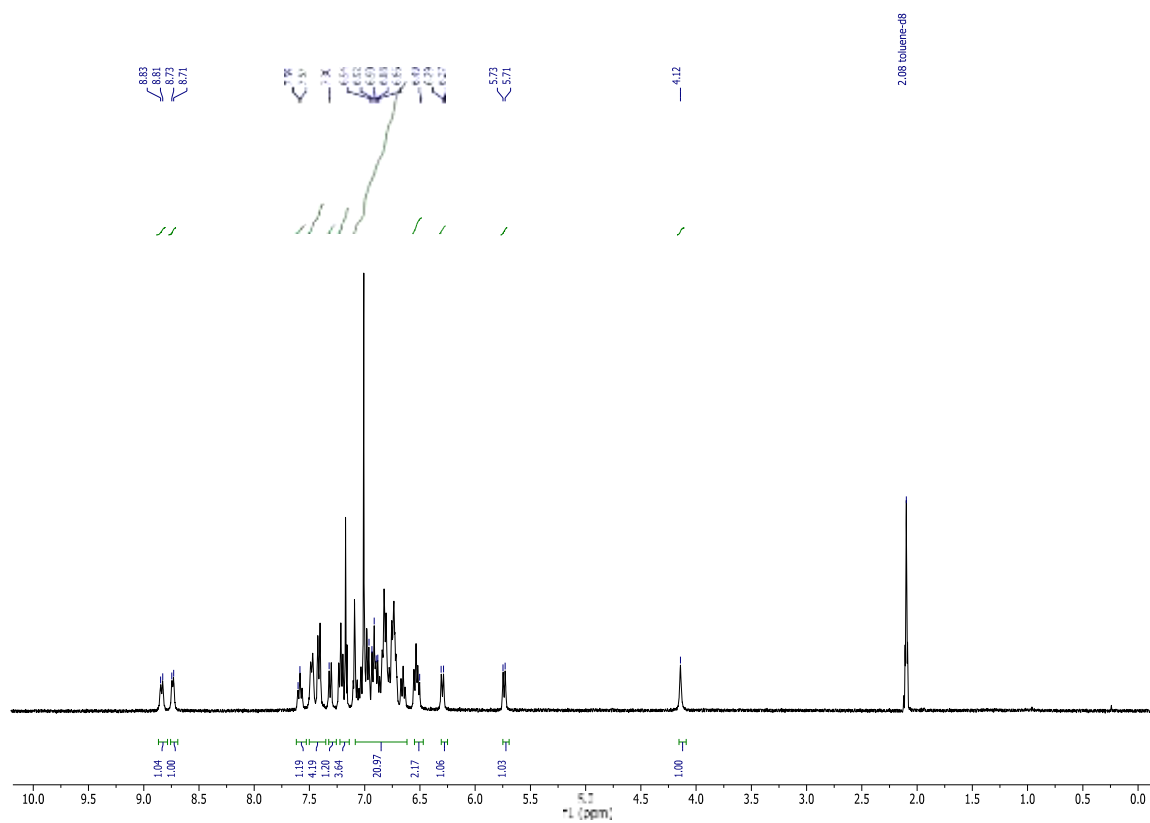

Figure S-18: Expansion of  $^1\text{H}$  NMR spectrum of *syn-3* in toluene- $d_8$  (aryl region) at  $-70\text{ }^\circ\text{C}$ .

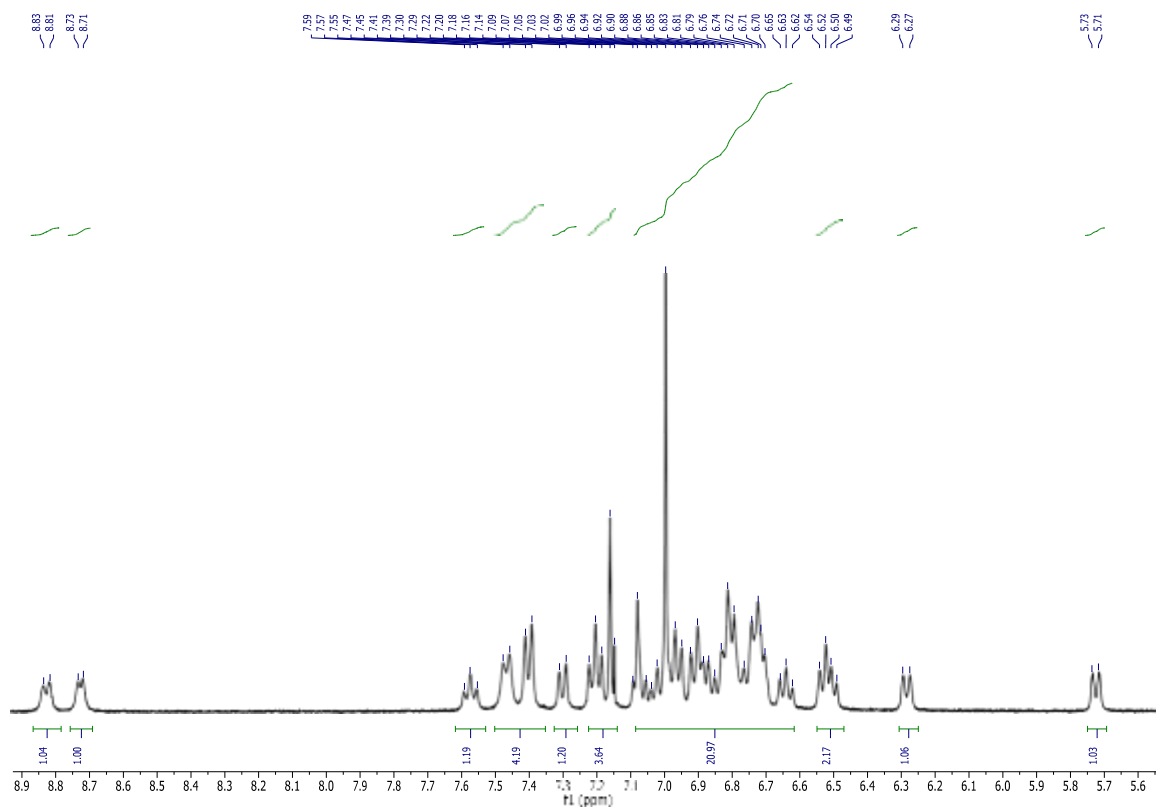

Figure S-19:  $^1\text{H}$  NMR spectrum of *syn-3* in  $\text{CDCl}_3$ .

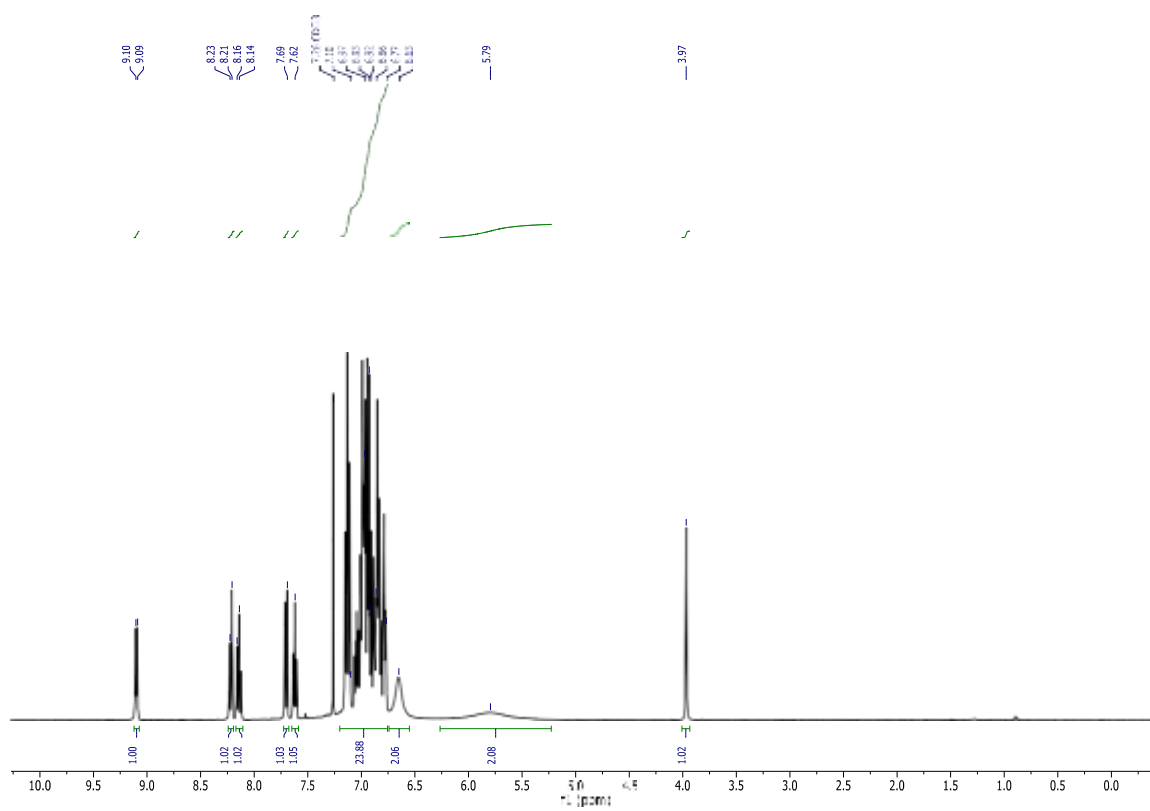

Figure S-20: Expansion of  $^1\text{H}$  NMR spectrum of *syn-3* in  $\text{CDCl}_3$  (aryl region).

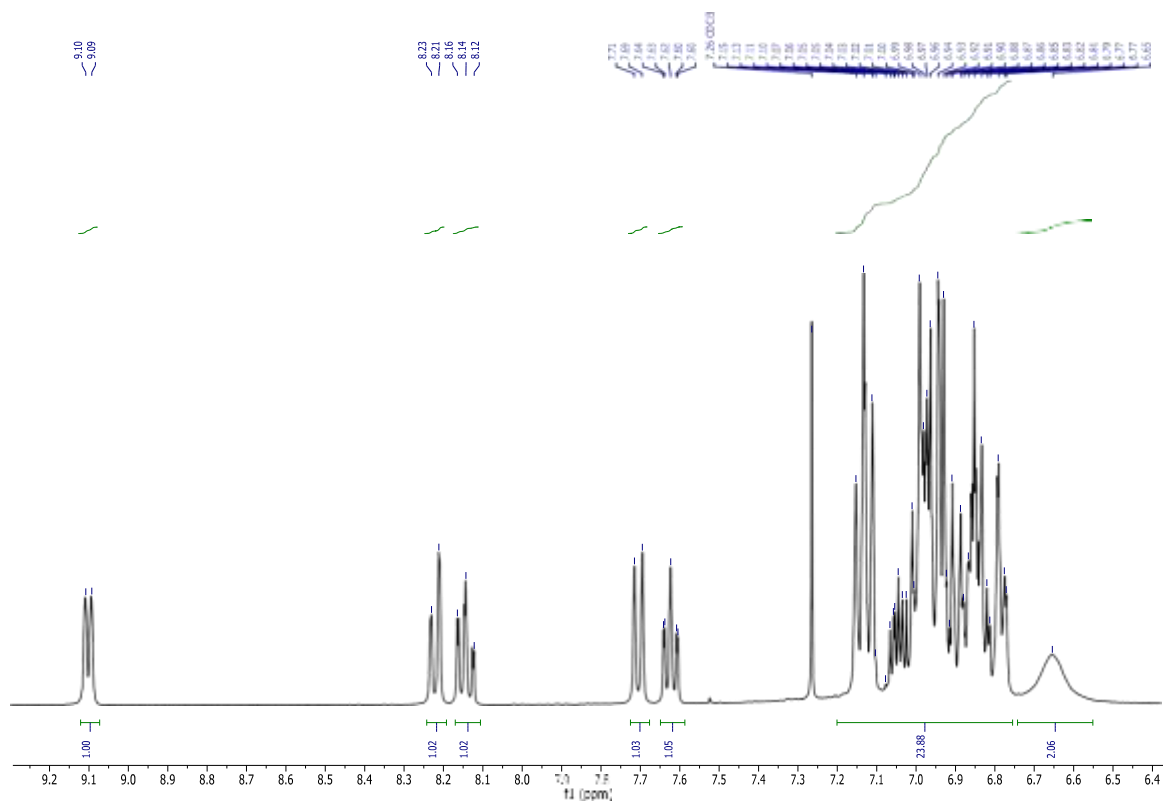

Figure S-21:  $^{13}\text{C}\{^1\text{H}\}$  NMR spectrum of *syn-3* in  $\text{CDCl}_3$ .

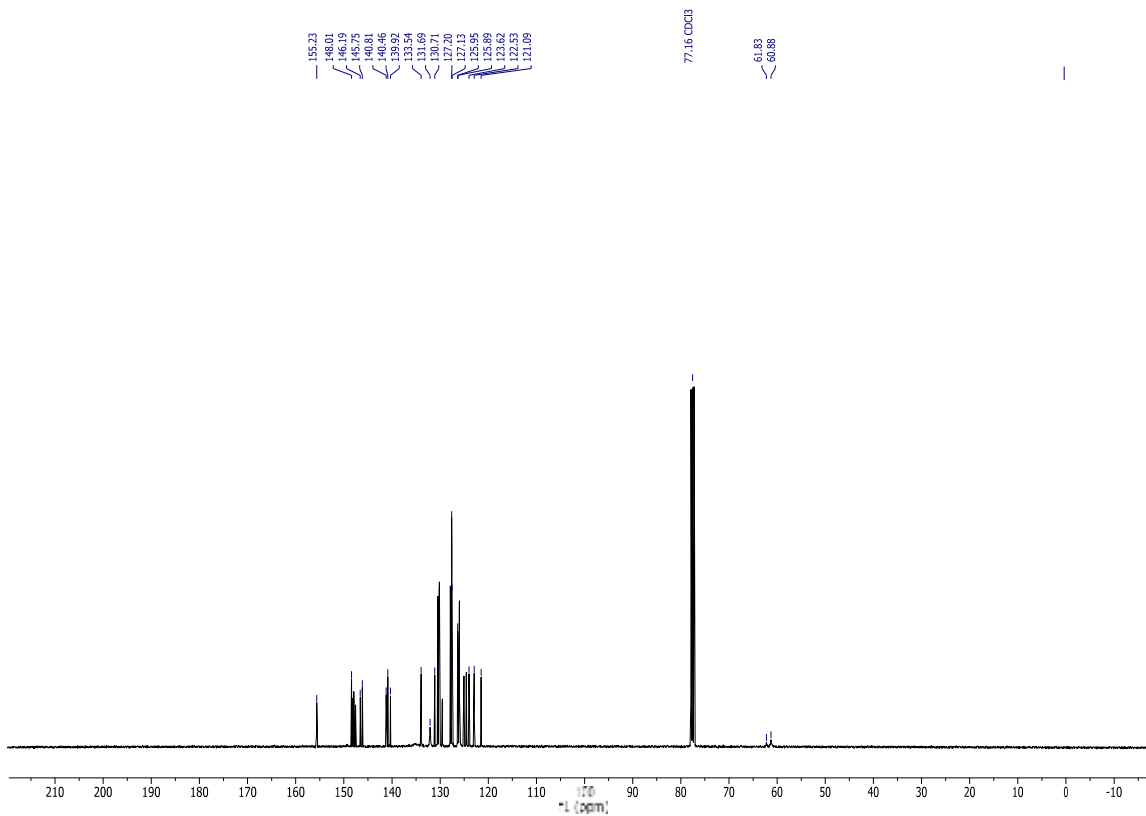

Figure S-22: Expansion of  $^{13}\text{C}\{^1\text{H}\}$  NMR spectrum of *syn-3* (in  $\text{CDCl}_3$  (aryl region)).

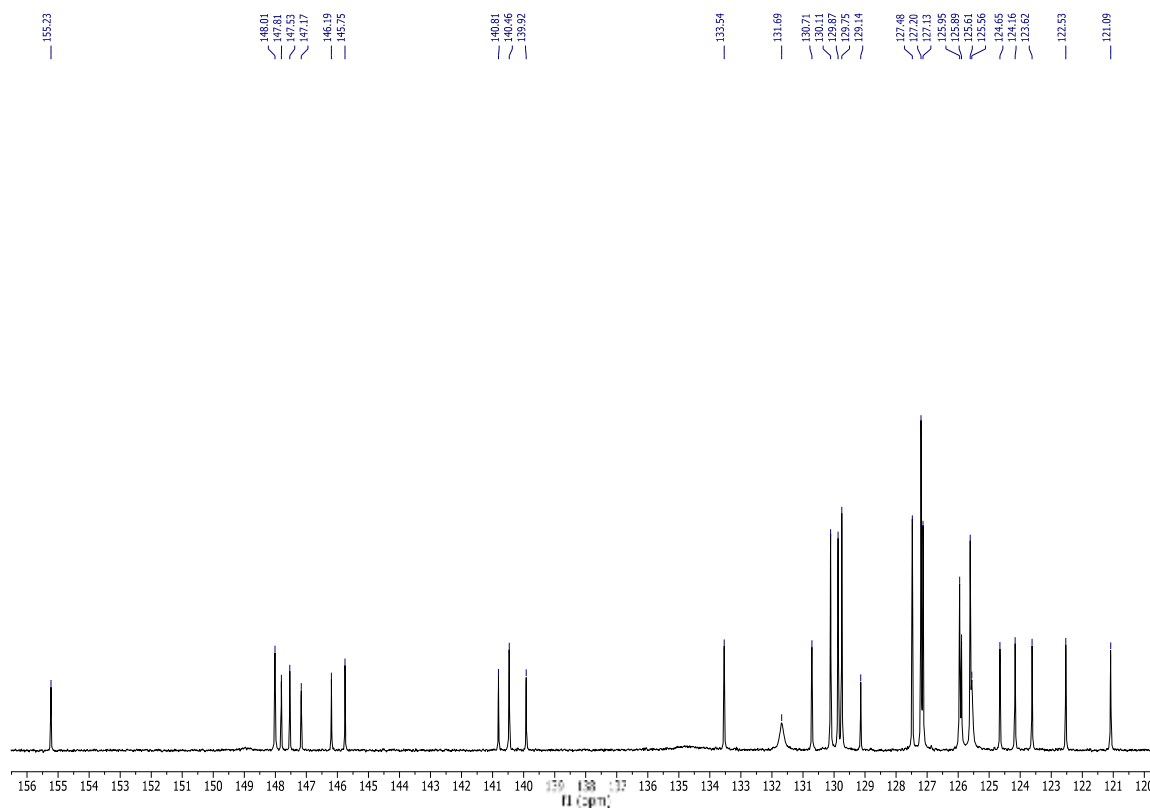



Figure S-23:  $^{11}\text{B}\{^1\text{H}\}$  NMR spectrum of *syn-3* in  $\text{CDCl}_3$ .

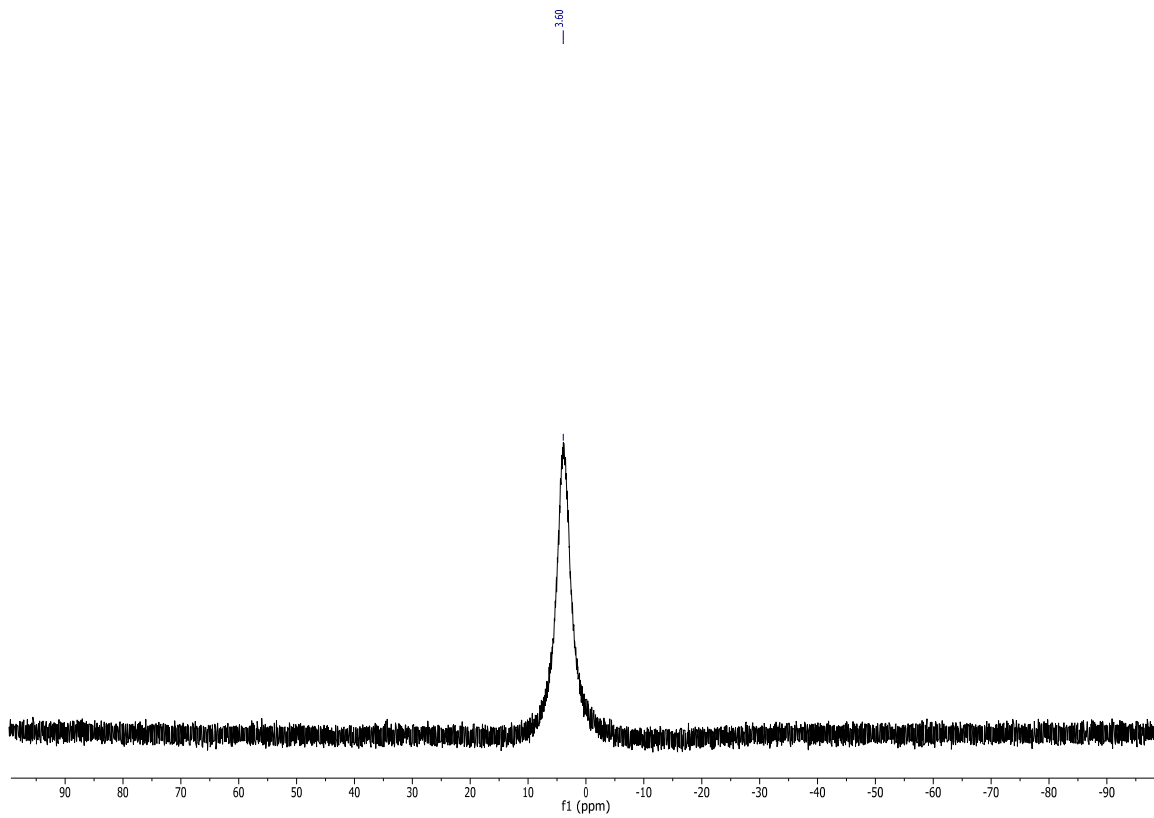

Figure S-24: FT-IR spectrum of *syn-3*.

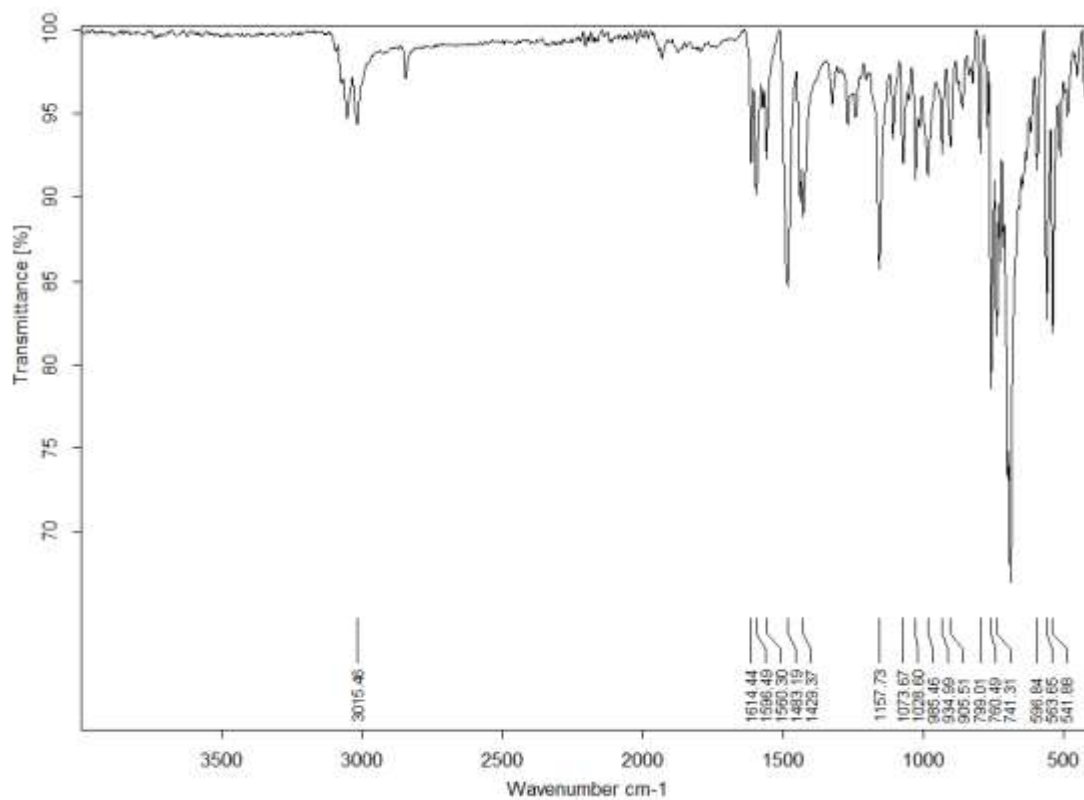

Figure S-25:  $^1\text{H}$  NMR spectrum of *anti*-**3** in  $\text{CDCl}_3$  (\* *n*-pentane).

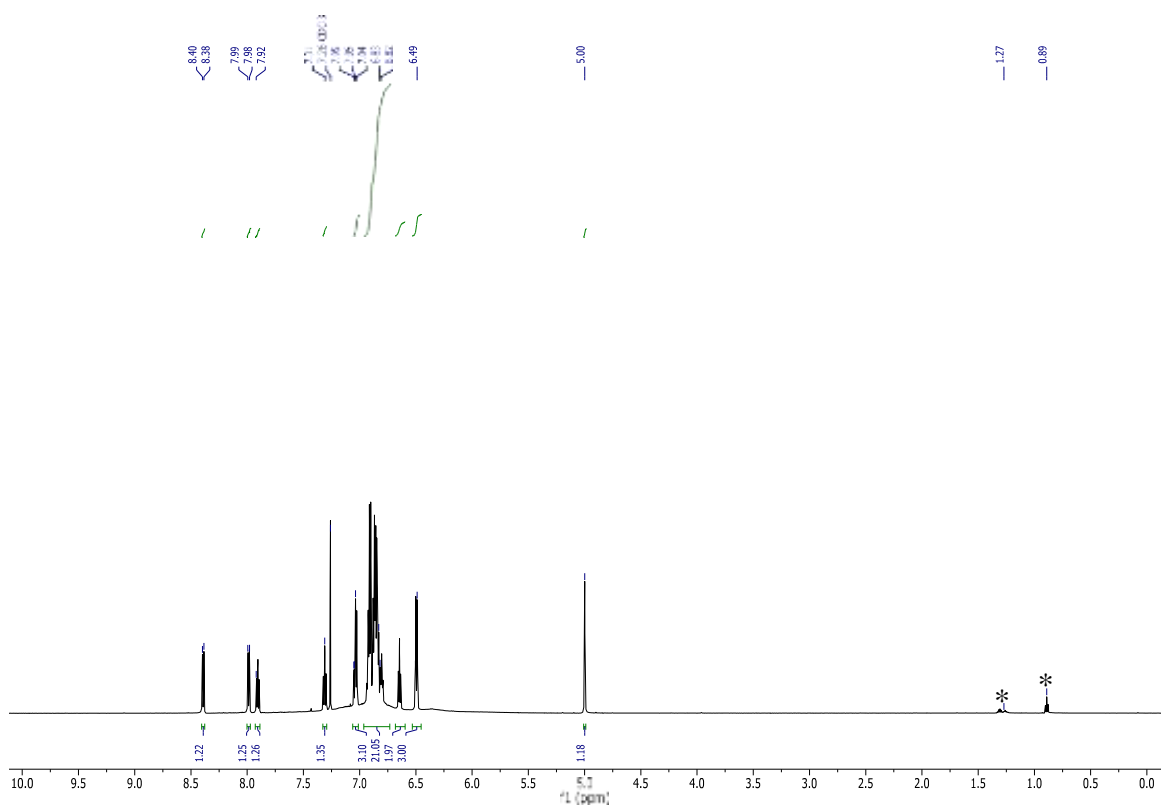

Figure S-26: Expansion of  $^1\text{H}$  NMR spectrum of *anti-3* in  $\text{CDCl}_3$  (aryl region).

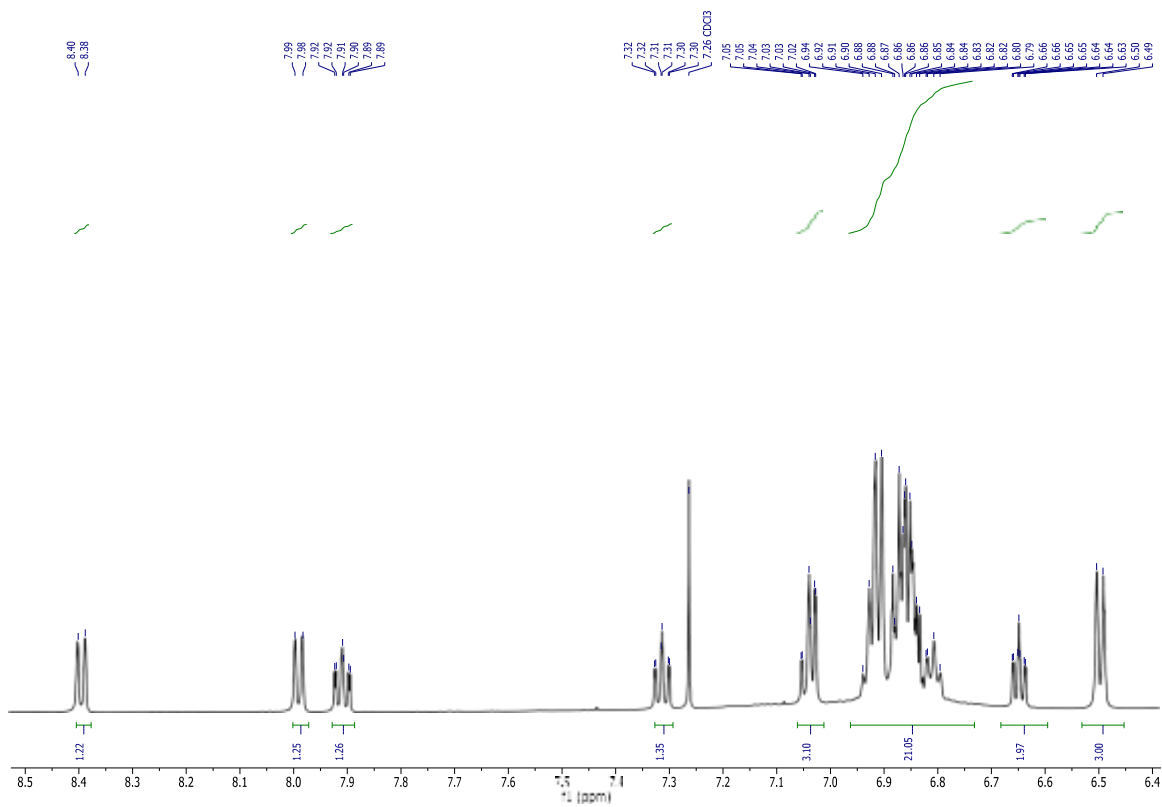

Figure S-27:  $^{13}\text{C}\{^1\text{H}\}$  NMR spectrum of *anti*-**3** in  $\text{CDCl}_3$  (\**n*-pentane).

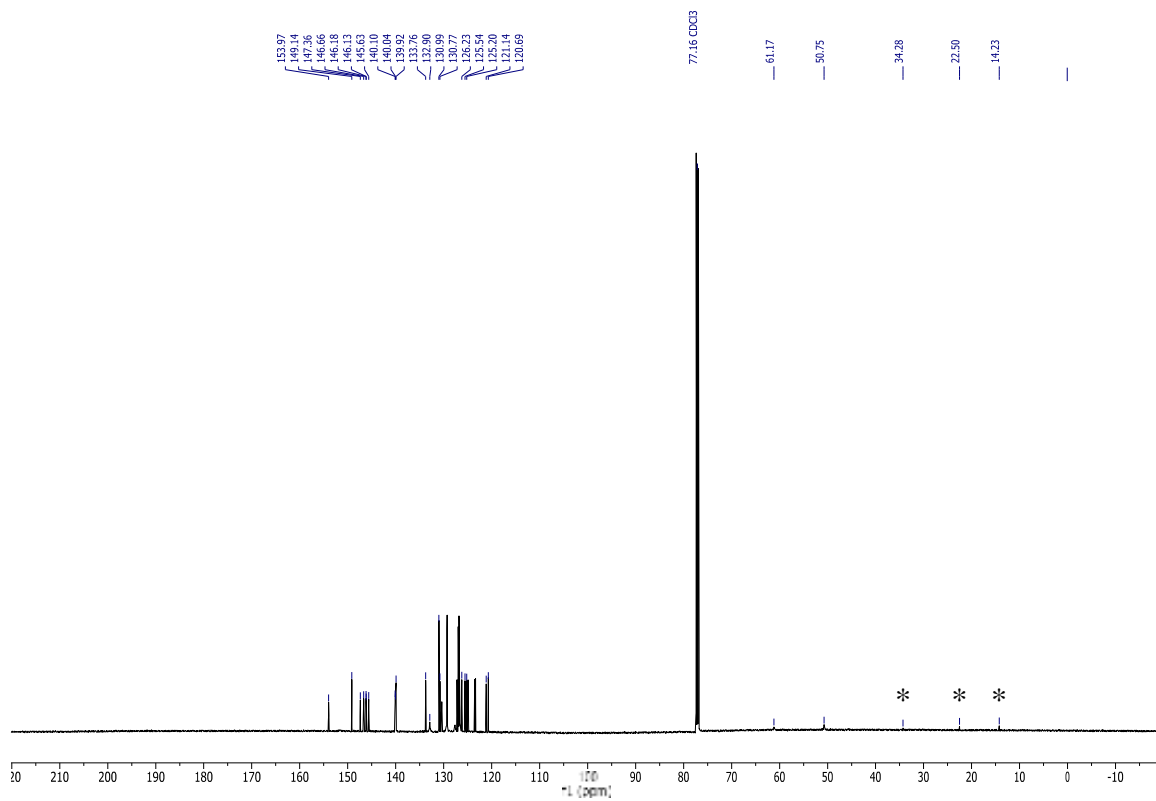

Figure S-28: Expansion of  $^{13}\text{C}\{^1\text{H}\}$  NMR spectrum of *anti*-**3** in  $\text{CDCl}_3$  (aryl region).

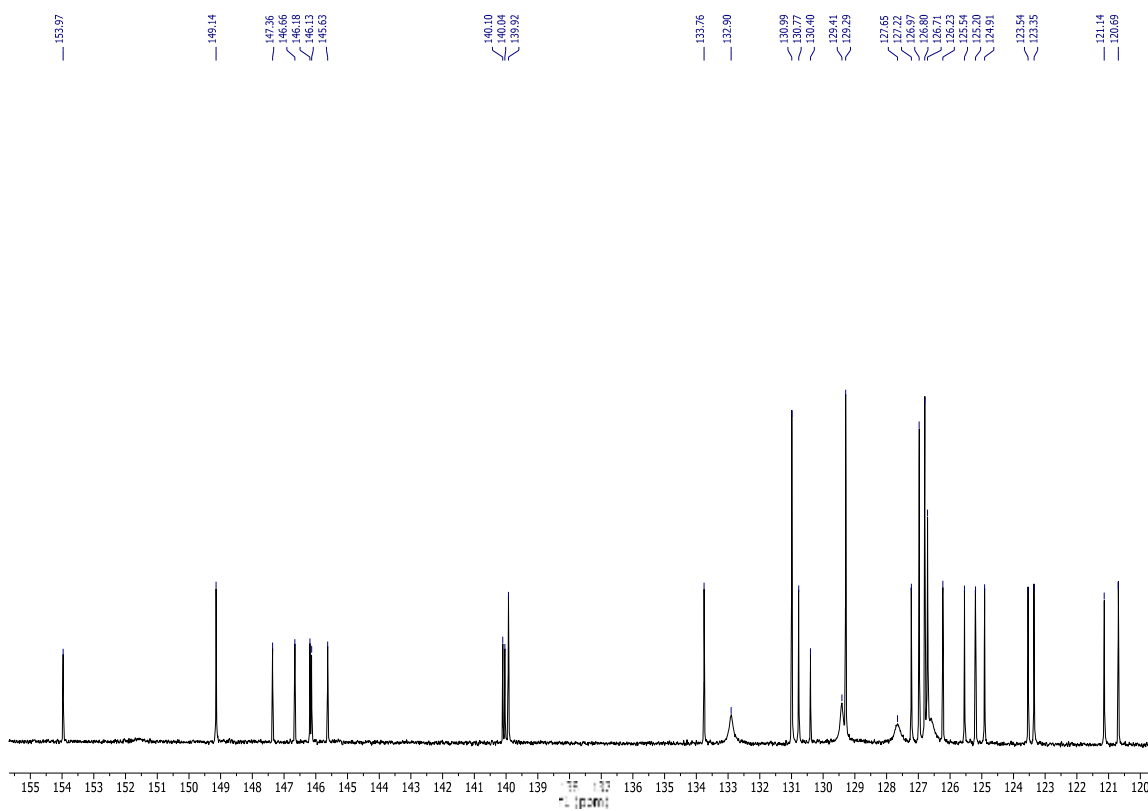

Figure S-29:  $^{11}\text{B}\{^1\text{H}\}$  NMR spectrum of *anti*-**3** in  $\text{CDCl}_3$ .

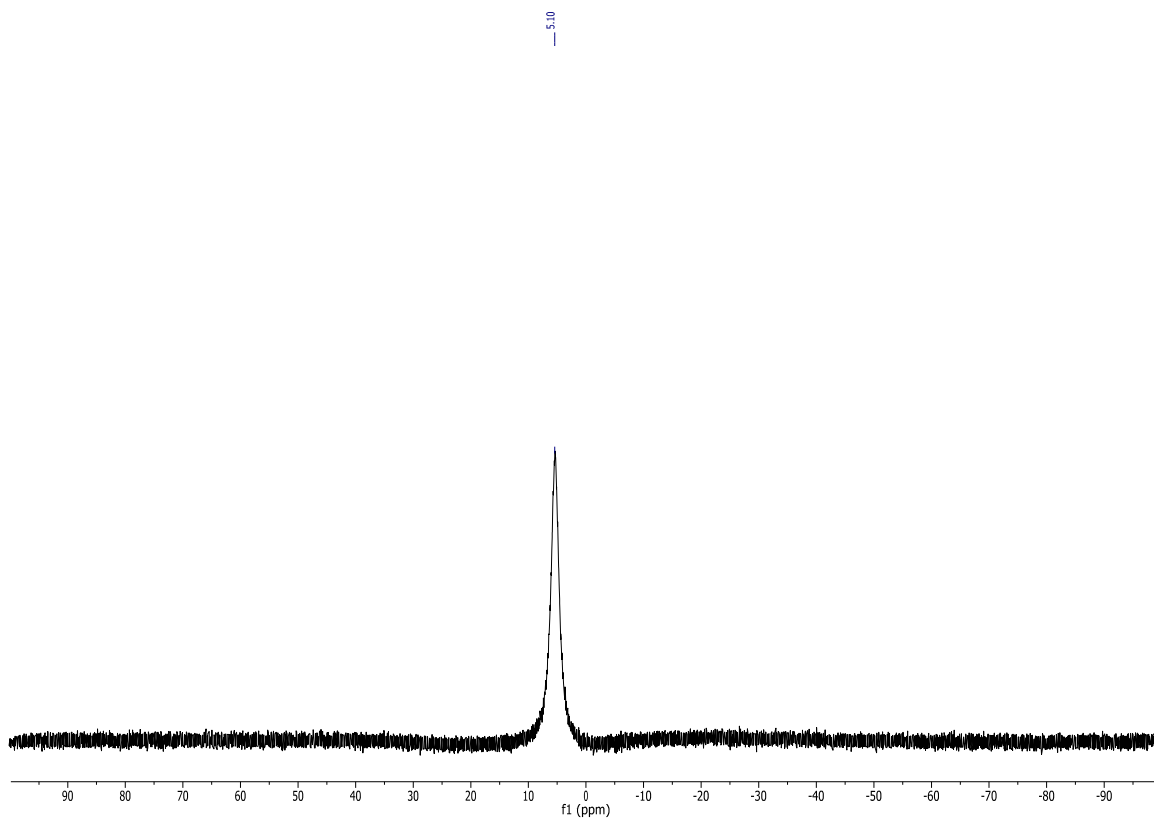

Figure S-30: FT-IR spectrum of *anti-3*.

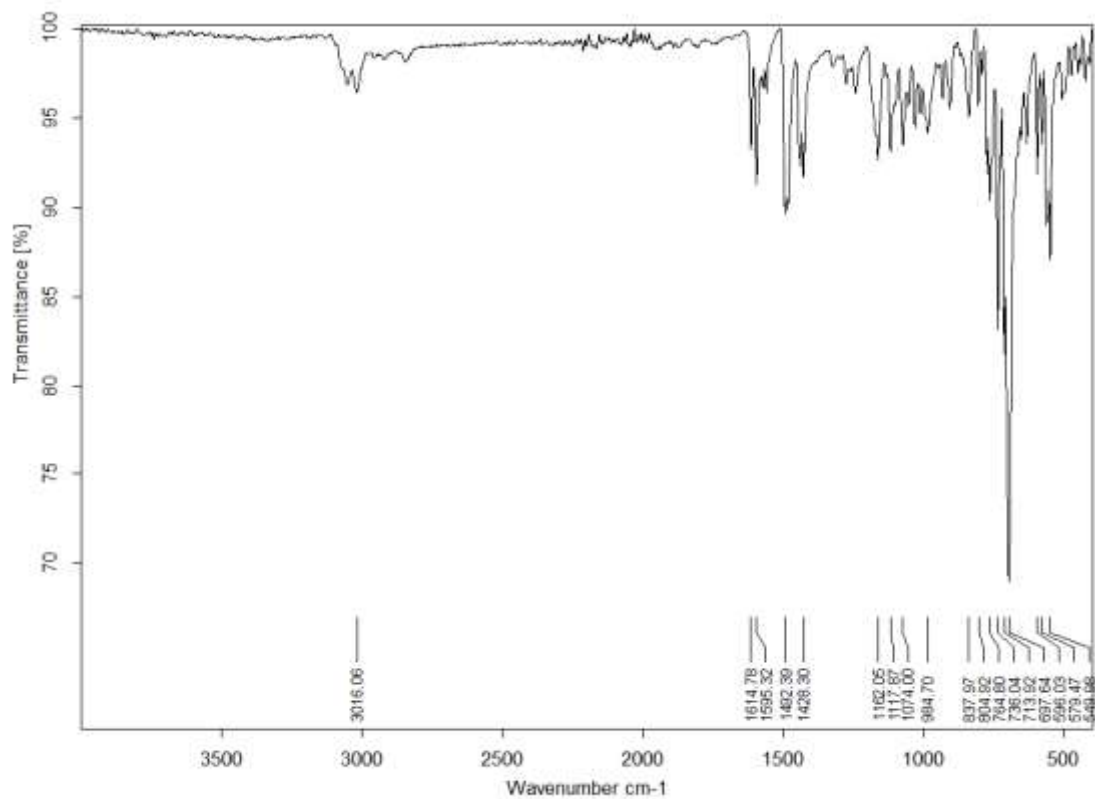



Figure S-31: Stacked plot of  $^1\text{H}$  NMR spectrum of *syn-4* at 25 °C and -45 °C in  $\text{CDCl}_3$ (  
•  $\text{CDCl}_3$ ).

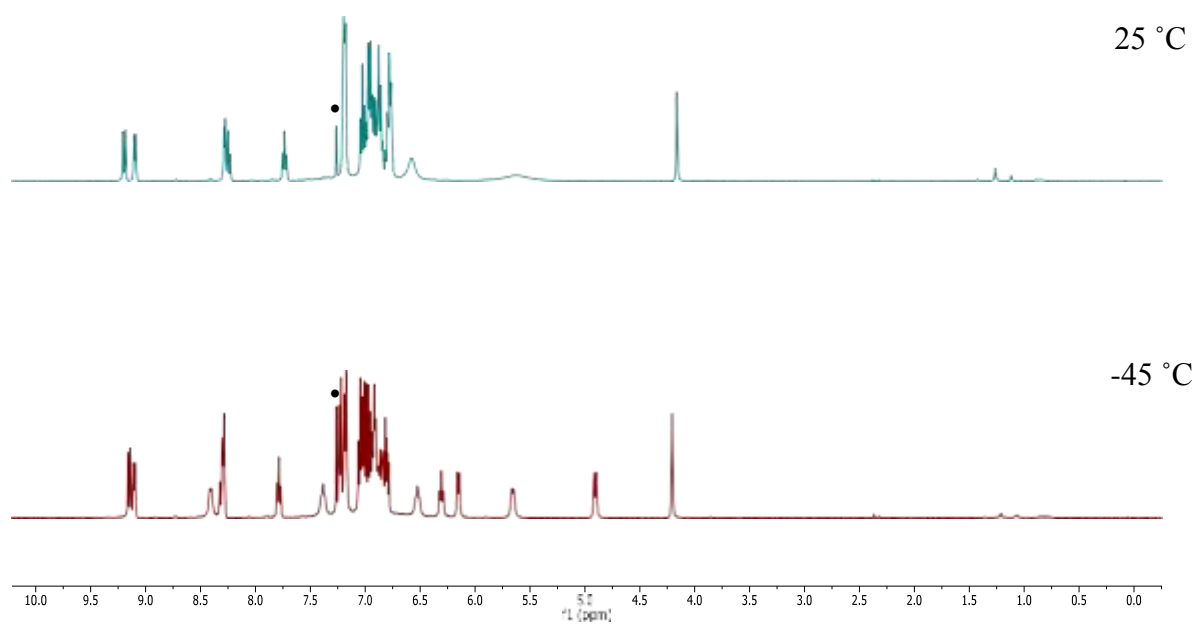

Figure S-32:  $^1\text{H}$  NMR spectrum of *syn-4* in  $\text{CDCl}_3$  at  $-45\text{ }^\circ\text{C}$ .

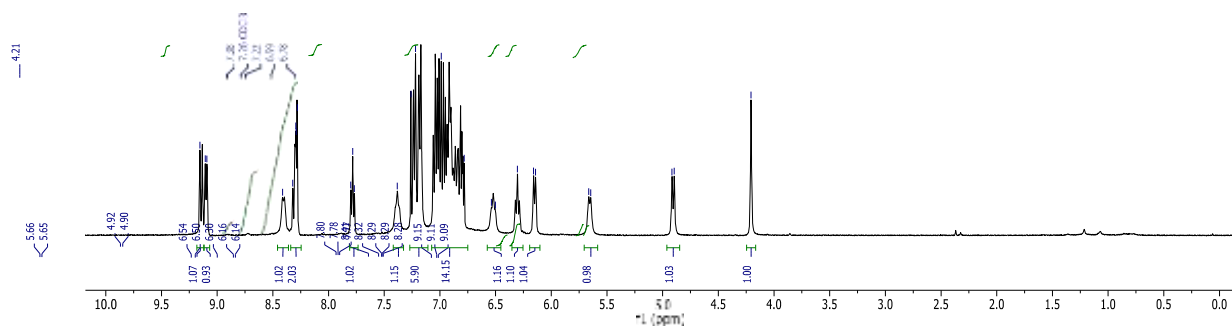

Figure S-33: Expansion of  $^1\text{H}$  NMR spectrum of *syn-4* in  $\text{CDCl}_3$  at  $-45^\circ\text{C}$  (aryl region).

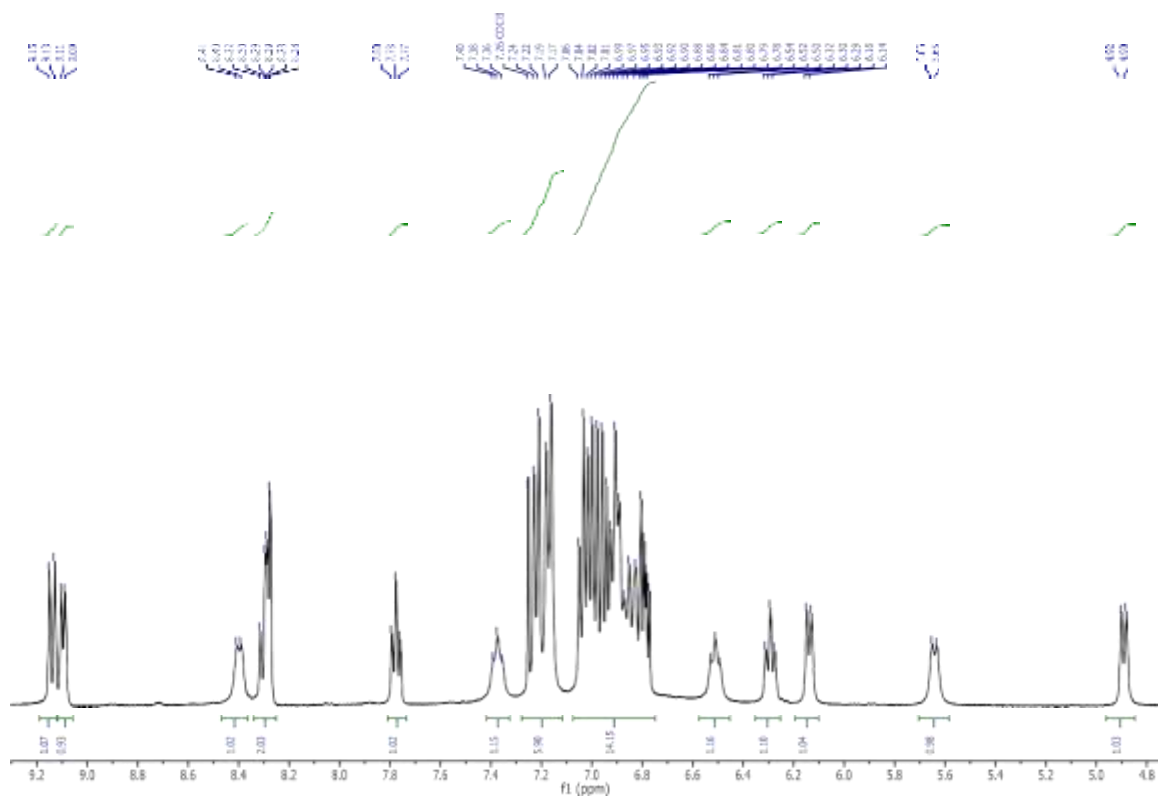

Figure S-34:  $^{13}\text{C}\{^1\text{H}\}$  NMR spectrum of *syn-4* in  $\text{CDCl}_3$ .

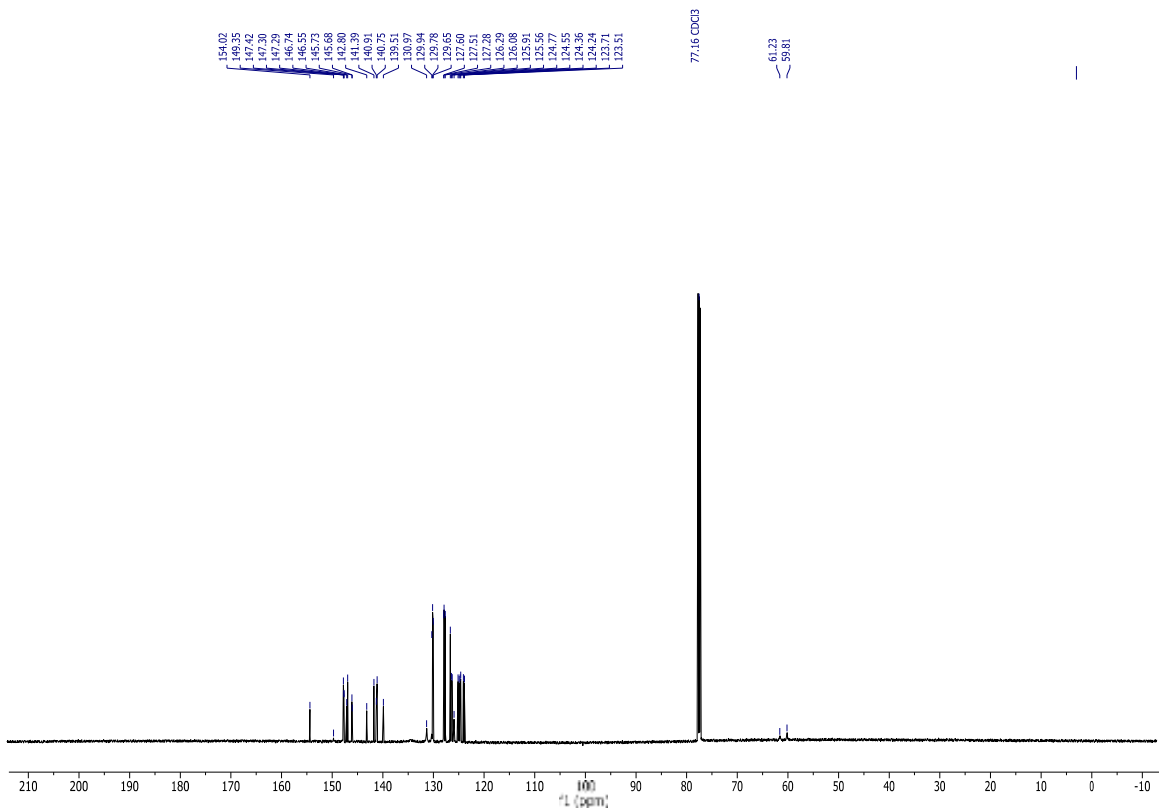

Figure S-35: Expansion of  $^{13}\text{C}\{^1\text{H}\}$  NMR spectrum of *syn-4* in  $\text{CDCl}_3$  (aryl region).

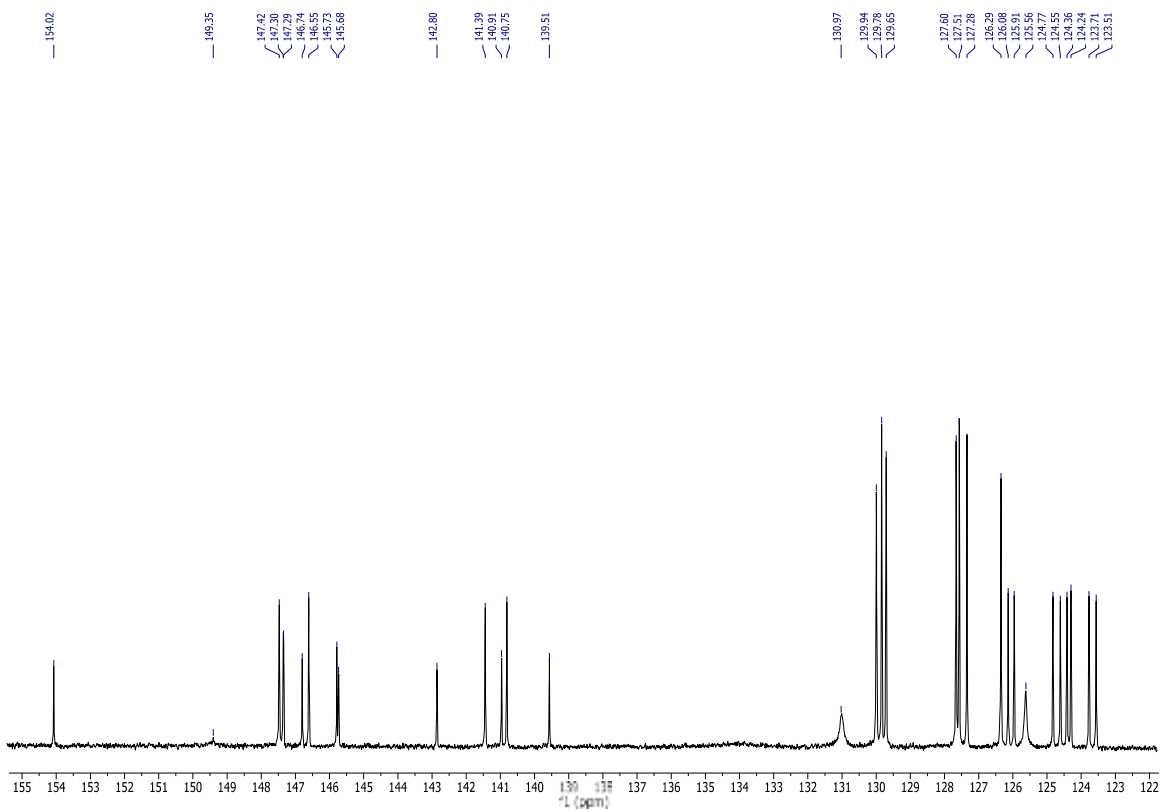

Figure S-36:  $^{11}\text{B}\{^1\text{H}\}$  NMR spectrum of *syn-4* in  $\text{CDCl}_3$ .

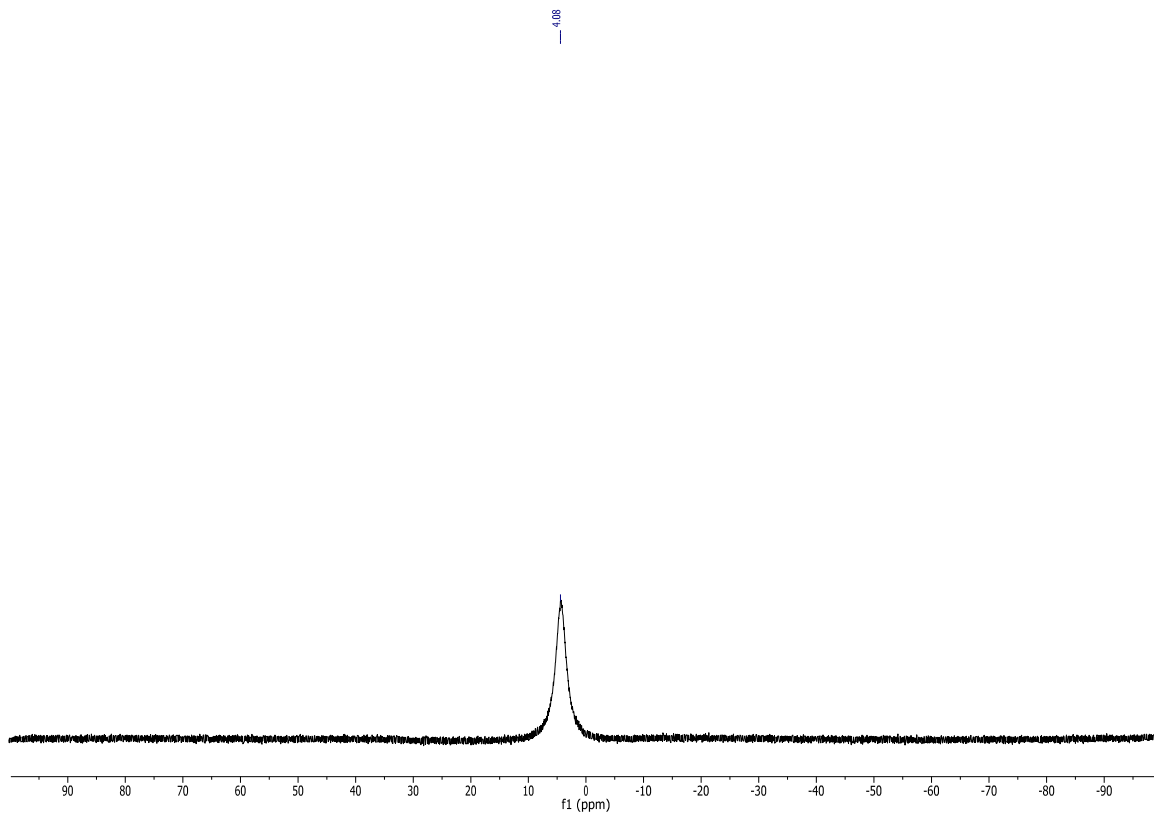

Figure S-37: FT-IR spectrum of *syn-4*.

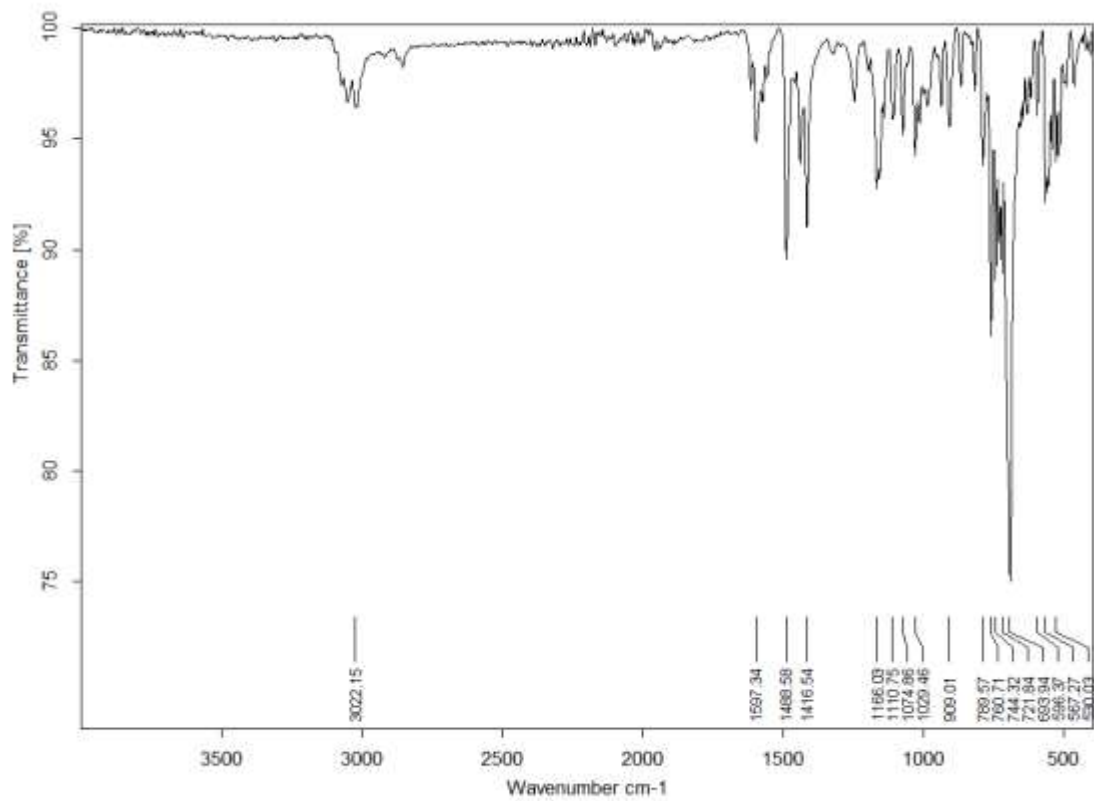

Table S-1: Crystallographic data for **1**, **2**, *syn-3*, *anti-3*, and *syn-4*.

|                                                           | <b>1</b>                           | <b>2</b>                                        | <i>syn-3</i>                       | <i>anti-3</i>                      | <i>syn-4</i>                                    |
|-----------------------------------------------------------|------------------------------------|-------------------------------------------------|------------------------------------|------------------------------------|-------------------------------------------------|
| CCDC                                                      | 1558294                            | 1558293                                         | 1558290                            | 1558291                            | 1558292                                         |
| Empirical formula                                         | C <sub>45</sub> H <sub>34</sub> BN | C <sub>44</sub> H <sub>33</sub> BN <sub>2</sub> | C <sub>45</sub> H <sub>34</sub> BN | C <sub>45</sub> H <sub>34</sub> BN | C <sub>44</sub> H <sub>33</sub> BN <sub>2</sub> |
| FW (g/mol)                                                | 599.54                             | 600.53                                          | 599.54                             | 599.54                             | 600.53                                          |
| Crystal system                                            | Monoclinic                         | Monoclinic                                      | Monoclinic                         | Triclinic                          | Monoclinic                                      |
| Space group                                               | <i>P2<sub>1</sub>/n</i>            | <i>P2<sub>1</sub>/n</i>                         | <i>P2<sub>1</sub>/c</i>            | <i>P-1</i>                         | <i>P2<sub>1</sub>/c</i>                         |
| <i>a</i> (Å)                                              | 9.8501(6)                          | 10.0560(4)                                      | 11.3768(8)                         | 9.6901(8))                         | 11.3303(5)                                      |
| <i>b</i> (Å)                                              | 17.9052(12)                        | 18.4589(7)                                      | 17.7046(14)                        | 9.8569(7)                          | 17.6684(7)                                      |
| <i>c</i> (Å)                                              | 18.5912(12)                        | 17.5795(6)                                      | 17.1202(14)                        | 17.5945(15)                        | 17.0803(6)                                      |
| $\alpha$ (deg)                                            | 90                                 | 90                                              | 90                                 | 87.561(4)                          | 90                                              |
| $\beta$ (deg)                                             | 93.551(2)                          | 96.5170(10)                                     | 108.047(2)                         | 78.334(4)                          | 107.431(2)                                      |
| $\gamma$ (deg)                                            | 90                                 | 90                                              | 90                                 | 83.695(3)                          | 90                                              |
| <i>V</i> (Å <sup>3</sup> )                                | 3272.6(4)                          | 3242.1(2)                                       | 3278.7(4)                          | 1635.5(2)                          | 3262.3(2)                                       |
| <i>Z</i>                                                  | 4                                  | 4                                               | 4                                  | 2                                  | 4                                               |
| <i>D<sub>c</sub></i> (mg m <sup>-3</sup> )                | 1.217                              | 1.232                                           | 1.215                              | 1.217                              | 1.223                                           |
| radiation, $\lambda$ (Å)                                  | 0.71073                            | 0.71073                                         | 0.71073                            | 0.71073                            | 0.71073                                         |
| temp (K)                                                  | 150(2)                             | 150(2)                                          | 150(2)                             | 274(2)                             | 150(2)                                          |
| <i>R1</i> [ <i>I</i> > 2 $\sigma$ <i>I</i> ] <sup>a</sup> | 0.0576                             | 0.0450                                          | 0.0522                             | 0.0485                             | 0.0456                                          |
| <i>wR2</i> ( <i>F</i> <sup>2</sup> ) <sup>a</sup>         | 0.1409                             | 0.1404                                          | 0.1523                             | 0.1347                             | 0.1341                                          |
| GOF ( <i>S</i> ) <sup>a</sup>                             | 1.057                              | 1.096                                           | 1.173                              | 1.068                              | 1.108                                           |

<sup>a</sup>  $R1(F[I > 2(I)]) = \sum \|F_o\| - |F_c| / \sum |F_o|$ ;  $wR2(F^2 [\text{all data}]) = [w(F_o^2 - F_c^2)]^{1/2}$ ;  $S(\text{all data}) = [w(F_o^2 - F_c^2)/(n - p)]^{1/2}$  (*n* = no. of data; *p* = no. of parameters varied;  $w = 1/[^2(F_o^2) + (aP)^2 + bP]$  where  $P = (F_o^2 + 2F_c^2)/3$  and *a* and *b* are constants suggested by the refinement program.<sup>1</sup>



References:

1. Sheldrick, G. M. *Acta Crystallogr.* **2008**, *A64*, 112.
